1 **The influence of objecthood on the representation of natural images in**  
2 **the visual cortex**

3  
4 Paolo Papale<sup>1,2,‡</sup>, Wietske Zuiderbaan<sup>3,‡</sup>, Rob. R.M. Teeuwen<sup>1</sup>, Amparo Gilhuis<sup>1</sup>, Matthew W. Self<sup>1,¶</sup>,  
5 Pieter R. Roelfsema<sup>1,4,5,¶,\*</sup> and Serge O. Dumoulin<sup>1,3,6,7,¶</sup>

- 6  
7 1. Department of Vision & Cognition, Netherlands Institute for Neuroscience (KNAW), 1105 BA  
8 Amsterdam, Netherlands  
9 2. Momilab Research Unit, IMT School for Advanced Studies Lucca, 55100 Lucca, Italy  
10 3. Spinoza Centre for Neuroimaging, 1105 BK Amsterdam, Netherlands  
11 4. Department of Integrative Neurophysiology, VU University, 1081 HV Amsterdam, Netherlands  
12 5. Department of Psychiatry, Academic Medical Centre, Postbus 22660, 1100 DD Amsterdam,  
13 Netherlands.  
14 6. Department of Experimental and Applied Psychology, VU University Amsterdam, Amsterdam  
15 1181 BT, Netherlands  
16 7. Department of Experimental Psychology, Helmholtz Institute, Utrecht University, 3584 CS  
17 Utrecht, Netherlands

18  
19 ‡ shared first author contribution

20 ¶ shared senior author contribution

21 \* correspondence should be addressed to: [p.roelfsema@nin.knaw.nl](mailto:p.roelfsema@nin.knaw.nl)

## 22 **Abstract**

23 Neurons in early visual cortex are not only sensitive to the image elements in their receptive field  
24 but also to the context determining whether the elements are part of an object or background. We  
25 here assessed the effect of objecthood in natural images on neuronal activity in early visual cortex,  
26 with fMRI in humans and electrophysiology in monkeys. We report that boundaries and interiors of  
27 objects elicit more activity than the background. Boundary effects occur remarkably early, implying  
28 that visual cortical neurons are tuned to features characterizing object boundaries in natural images.  
29 When a new image is presented the influence of the object interiors on neuronal activity occurs  
30 during a late phase of neuronal response and earlier when eye movements shift the image  
31 representation, implying that object representations are remapped across eye-movements. Our  
32 results reveal how object perception shapes the representation of natural images in early visual  
33 cortex.

34

## 35 **Introduction**

36 The visual scenes that we perceive are filled with objects. We readily identify the extent of the  
37 objects and their boundaries, a perceptual organization process that is important for our  
38 understanding of an image's meaning. Accordingly, the judgments of people who are asked to mark  
39 regions occupied by objects and their boundaries are highly consistent<sup>1</sup>. Object and boundary  
40 perception even influence low-level vision, because image elements at object boundaries are better  
41 perceived than image elements at less relevant image locations<sup>2,3</sup>. Furthermore, image elements of  
42 objects have a higher perceived contrast than those that are part of the background<sup>4</sup>. Despite these  
43 influences on low-level visual perception, it is not yet well understood how objecthood influences  
44 neuronal representations in early visual cortex<sup>5</sup>.

45 Classical descriptions of the activity of neurons at the early levels of the visual system focus on the  
46 features that drive neurons, such as the contrast and orientation in a neuron's receptive field (RF).  
47 In addition, there are also non-classical, contextual influences on neuronal activity, which originate  
48 from outside the neurons' RFs and play a role in the grouping of features into objects. Here we focus  
49 on two such effects: boundary modulation (BoM) related to the detection of object boundaries, and  
50 object-background modulation (OBM) related to the grouping of object features into objects and  
51 their segregation from the background.

52 Neurons in the primary visual cortex (V1) and area V4 increase their firing rate when their RF is  
53 centered on an elongated contour that extends well beyond their RF (Fig. 1a)<sup>6,7</sup>. Elongated contours  
54 are relevant for perceptual organization because they usually signal the borders of objects in natural  
55 scenes, whereas shorter contours are more likely to be part of the background<sup>8,9</sup>. BoM is the extra  
56 activity elicited by contours that demarcate object boundaries (Fig. 1a,d). Similarly, V1 and V4  
57 neurons exhibit stronger responses when their RF falls on the interior of a perceptual object than  
58 when it falls on the background (Fig. 1b)<sup>10-12</sup>. This OBM occurs for all image regions that are part of  
59 an object, suggesting that the response enhancement could cause the binding of the distributed  
60 representation of features in early visual cortex into coherent perceptual objects<sup>13</sup>. This view is  
61 supported by the finding that objects relevant for behavior elicit stronger OBM than objects that  
62 are not, implying a relation between OBM and object-based attention that co-selects all features of  
63 a relevant object<sup>11</sup>. BoM and OBM are thought to reflect the recurrent interactions within and across  
64 visual areas<sup>14</sup> that determine the spread of enhanced neuronal activity and thereby the perception  
65 of spatially extended objects in a scene<sup>13</sup>.

66 So far, BoM and OBM have only been measured with artificial stimuli, such as textures and displays  
67 with many line elements (Fig. 1a-c). Establishing the relevance of these signals for natural vision is

68 challenging, yet important, because neuronal response properties that do not play a role in the  
69 perception of natural stimuli are likely to be of limited relevance<sup>15</sup>. A recent study explored  
70 contextual signals in V1 elicited by more complex shapes, such as the texture-defined ‘U’ of Figure  
71 1c<sup>16</sup>, but researchers have, to our knowledge, not yet examined BoM and OBM with natural visual  
72 stimuli. If BoM occurs in natural images, we predict that the more salient object boundaries elicit  
73 stronger neuronal activity than image elements of the background. Similarly, if OBM occurs for  
74 natural images, extra activity should be elicited by object interiors compared to the background.

75 To investigate the influence of objecthood on neuronal activity in early visual cortex, we used the  
76 Berkeley Segmentation data set (BSD), a library of natural images in which human observers marked  
77 object boundaries<sup>1</sup>. We used functional MRI to examine neuronal responses across many regions of  
78 visual cortex in humans and we also recorded multi-unit activity in V1 and V4 of monkeys to gain  
79 insight into the temporal profile of spiking activity. We report that objecthood influences neuronal  
80 activity. Object boundaries increased the early neuronal responses and object interiors enhanced  
81 activity during a later phase of the response. When subjects made eye movements across the  
82 images, these contextual effects carried over from one fixation to the next, implying that objects  
83 are remapped across eye movements in early visual cortex<sup>17,18</sup>.

84

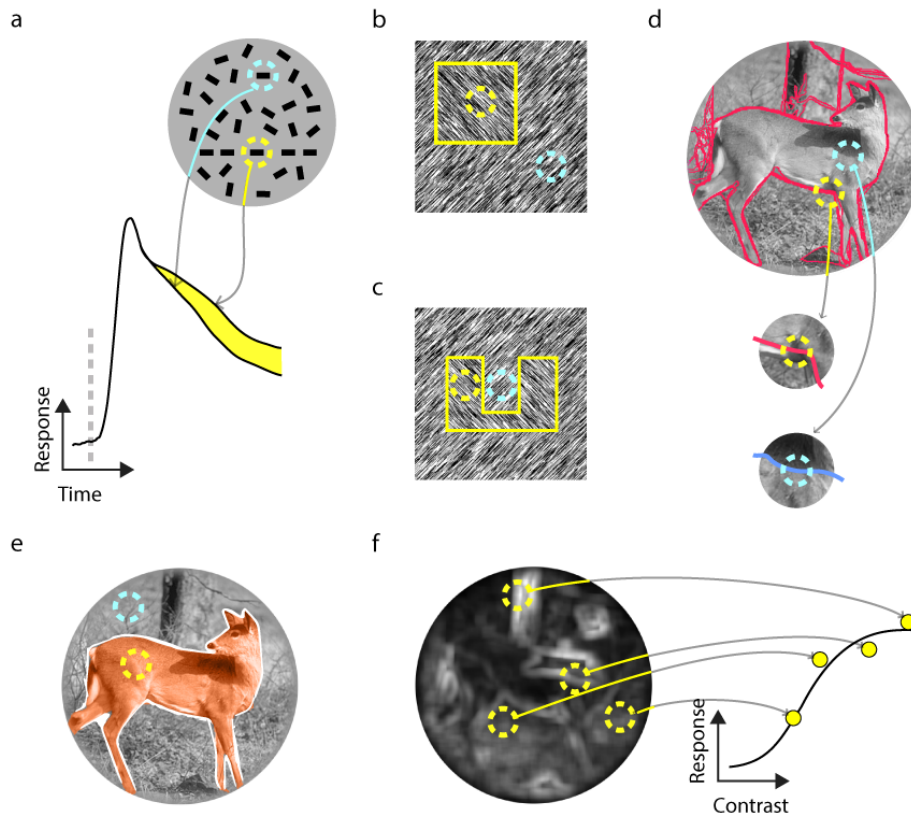

85

86 **Figure 1. The influence of object perception on neuronal responses in early visual cortex.**

87 **a**, The response of V1 and V4 neurons is enhanced when their RF falls on an elongated contour that  
88 extends well beyond their RF<sup>6</sup>. **b,c**, V1 and V4 neurons exhibit stronger responses when their RF  
89 falls on the interior of a perceptual object (square with different orientation in b and 'u' shape in c) than  
90 when it falls on the background<sup>16</sup>. **d,e**, We ask whether differences between object borders (yellow  
91 in d) and other image regions (cyan in d) and between the interiors of objects (yellow in e) and the  
92 background (cyan in e) in natural images influence the response of visual cortical neurons. **f**, We  
93 compared the response amplitudes evoked by image elements of objects and the background,  
94 taking the local contrast in the (p)RF into account.

95

## 96 Results

### 97 *Objecthood modulates responses in human early visual cortex*

98 In the first experiment, we used ultra-high field fMRI at 7 Tesla in four human participants to  
99 investigate OBM and BoM within natural images (Fig. 2). Our analysis separated BoM (Fig. 1d) and  
100 OBM (Fig. 1e) from the influence of the contrast of image elements by evaluating the influence of  
101 image properties in the population receptive field (pRF) on the neuronal responses at each cortical

102 location. We chose 45 images from the BSD (Fig. S1) for which the object boundaries had been  
103 annotated by an independent group of human observers<sup>1</sup>.

104 To separate the influence of image contrast from object perception we computed the contrast  
105 response functions (CRFs; Fig. 1f) for six regions of interest: V1, V2, V3, human V4 (hV4), the lateral  
106 occipital visual field maps 1/2 (LO-1/2) and V3-a/b. First, in a separate experiment, we measured  
107 the population receptive field for each cortical location (pRF; Fig. S2)<sup>19</sup>. Second, to compute the CRF,  
108 we estimated the response amplitude as function the root mean square (RMS) contrast in each  
109 pRF<sup>20</sup> (10 contrast bins, Fig. 1f).

110 Next, we computed the CRF separately when the pRF fell on an object border versus a non-border  
111 image region, and when it fell on an object region versus on the background for every image (Fig.  
112 2b)<sup>1,21</sup>. We defined object borders in the BSD images as those that were frequently marked by the  
113 observers as object boundaries, and contrasted them to non-border image regions that were not  
114 marked (Fig S3). These non-border regions could be part of the object interior (as the example in  
115 Fig. 1d and Fig. S3) or background (see Methods).

116 The computation of the CRF allowed us to separate BoM and OBM from the influence of contrast.  
117 Cortical responses elicited by object borders were significantly higher than those elicited by non-  
118 border image regions in areas V1, V2 and V3 (Fig. 2c; all  $p$ s < 0.001, bootstrap test, see Methods),  
119 but not in areas V3ab, hV4 and LO-1 and 2 (Fig. S2). Thus, we observed significant BoM in V1-V3.  
120 Object boundaries of a particular contrast elicit a larger response, on average, than image regions  
121 with the same contrast that do not coincide with object boundaries.

122 To examine the influence of OBM, we compared CRFs of cortical locations with pRFs on object versus  
123 background regions (Fig S3). The response amplitude when a pRF was centered on an object was

124 significantly stronger than when it was centered on the background in V1 and V2 (Fig. 2d; all  $p$ s <  
125 0.001, bootstrap test) but not in V3, hV4, LO-1/2 and V3A/b. We observed the same pattern of  
126 results also at the level of individual participants, for both BoM and OBM (Figure S4).

127 We conclude that object borders elicit larger response amplitudes in early visual cortex than non-  
128 border image regions, and that object regions elicit more activity than background regions, even if  
129 image contrast is the same.

130

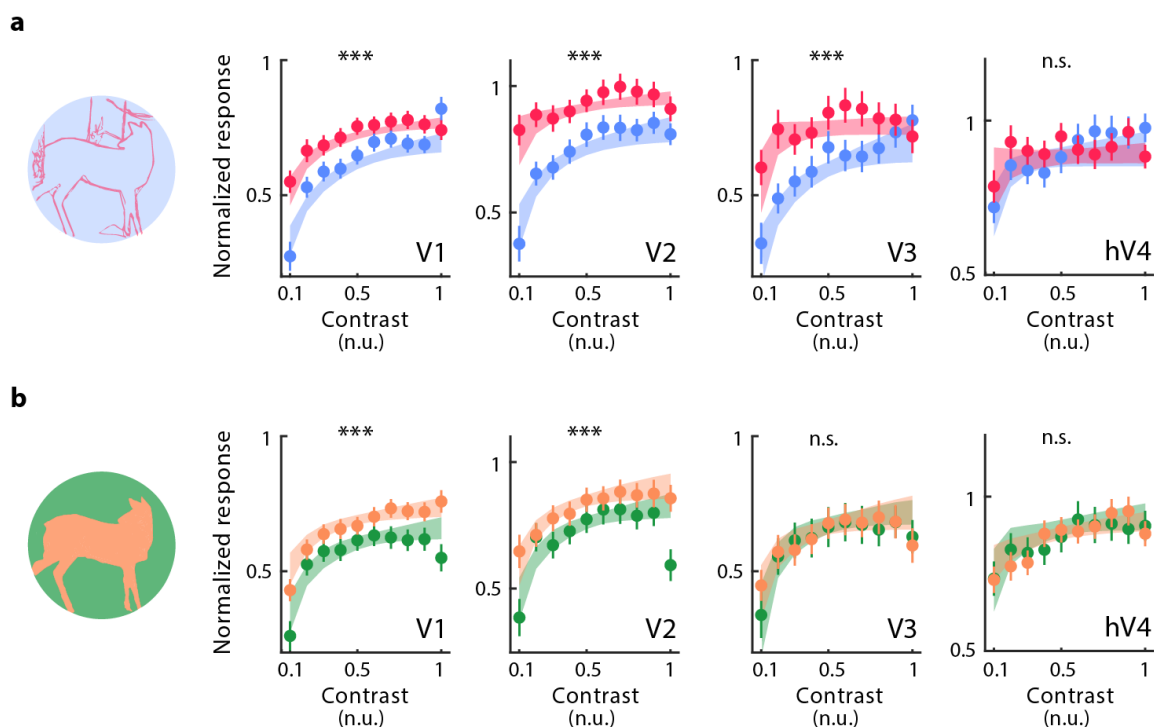

131

132 **Figure 2. Objecthood influences responses in human early visual cortex.**

133 Four participants viewed 45 natural images while their brain responses were recorded with fMRI. **a**,  
134 Response amplitudes elicited by object boundaries (red) and background contours (blue) as a  
135 function of contrast in the pRF (x axis). **b**, Response amplitudes elicited by object interiors (orange)  
136 and the background (green). fMRI responses were normalized to the response to a full-field, 100%  
137 contrast stimulus. Shaded regions denote 95% confidence intervals determined by bootstrapping.  
138 Bars represent SEM across images (\*\*\*) indicates  $p < 0.001$ , bootstrap test; n.s. non-significant).  
139

140 *Objects and their boundaries enhance the spiking activity of V1 and V4 neurons but at different*  
141 *latencies*

142 A limitation of fMRI is its poor temporal resolution and its indirect relation to spiking activity<sup>22</sup>.  
143 Therefore, we recorded spiking activity with chronically implanted electrode arrays elicited by BSD  
144 stimuli in two macaque monkeys. We placed the arrays in areas V1 and V4 and recorded multi-unit  
145 spiking activity (MUA). Whereas the pRFs in the MRI experiment covered the entire images, the RFs  
146 of the V1 and V4 neurons in the electrophysiology experiment were confined to a limited region of  
147 the visual field. To increase the sample of image patches falling in the RFs, we trained the monkeys  
148 to fixate at multiple locations on a total of four images (Fig. 3a).

149 At the start of the trial, the monkey directed gaze to a fixation point on a gray background. We  
150 presented the image once the monkey had maintained fixation for 300ms. After a delay of 400ms,  
151 we presented a new fixation point and the monkey made a saccade to it and maintained fixation for  
152 a further 400ms (Fig. 3a). The repositioning of gaze was repeated for a total of 6 positions (sampled  
153 from a uniformly spaced grid with ~500 points) per trial. The neuronal response elicited by the image  
154 appearing at the first gaze position differs from that for later fixations because the image suddenly  
155 appears in the RF. Later fixations are preceded by saccades causing a rapid movement of part of the  
156 image through the RF. Furthermore, the image is now familiar and the monkeys may have  
157 recognized and segmented the objects during previous fixations. We therefore separately analyzed  
158 the response elicited by stimulus onset (Fixation 1) and later fixations (Fixations 2-6). The results for  
159 fixations 2-6 were comparable and we therefore pooled the data across these fixations (Fig. S5).

160



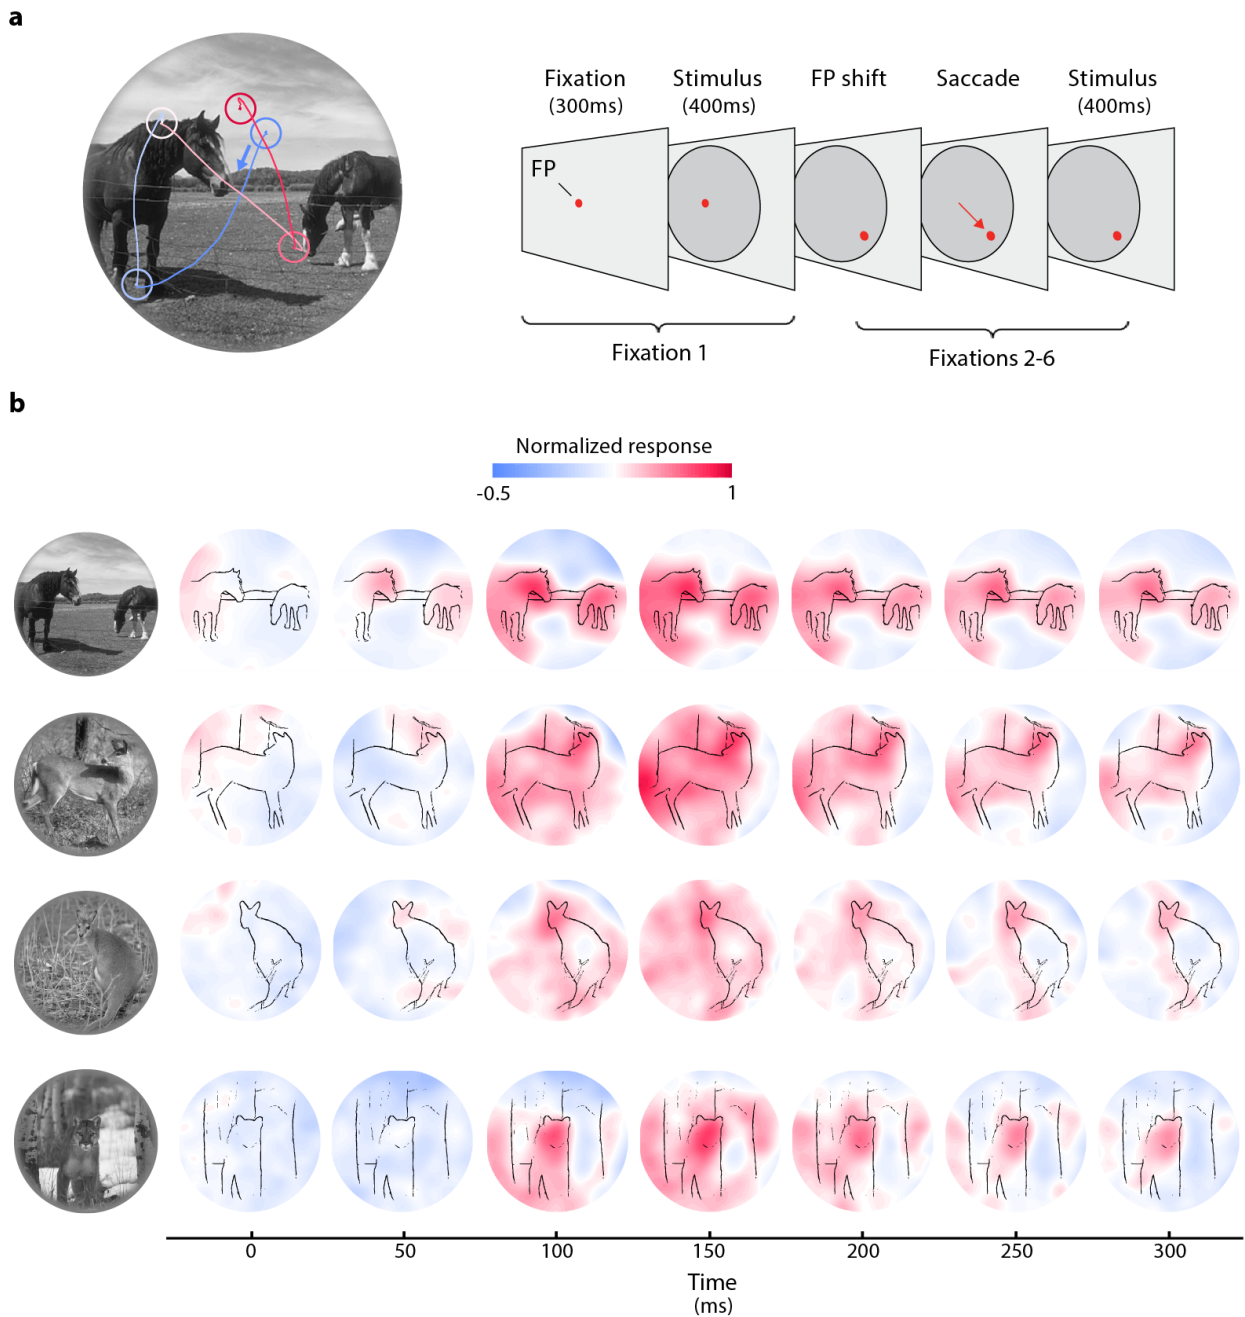

161

162 **Figure 3. Influence of objects on spiking activity in areas V1 and V4 evoked by natural scenes.**

163 **a**, The monkey performed a sequence of eye-movements across the natural images. We presented  
 164 a natural image once the monkey had maintained gaze on a red fixation point for 300ms. After a  
 165 delay of 400ms, a new fixation point appeared and the monkey made a saccade to it and maintained  
 166 fixation for a further 400ms. Per trial, the monkey made a total of 5 eye movements to fixation  
 167 points sampled from a uniformly spaced grid (~500 points). **b**, Overlay of V4 spiking activity over the  
 168 natural images at different time points (average of fixations 2-6). V4 response is determined by  
 169 contrast, local and global image structure and these factors were disentangled in subsequent  
 170 analyses. Fig. S3b shows the same analysis for fixation 1 in V4 and fixation 1 and 2-6 in V1.

171

172 We first examined the overall level of activity in V1 and V4 elicited by the four natural images (Fig.  
173 3b and S3). The response profiles suggest that extra activity is focused on the objects, but the  
174 influences of objecthood and contrast were not yet separated in this analysis. To disentangle the  
175 influence of BoM and OBM from that of contrast, we determined CRFs by binning the contrast in  
176 the RF of neurons in area V1 (77 recording sites, 44 in monkey B and 33 in monkey M) and V4 (22  
177 sites in monkey B), separately for contours that demarcate object boundaries and those that do not.  
178 Object borders elicited stronger spiking activity (time-window 0-300ms) than non-object image  
179 regions with the same contrast in V1 and V4 (Fig. 4a). BoM occurred during the first fixation as well  
180 as during later fixations (all  $ps < 0.001$ , bootstrap test) and was present at many V1 recording sites  
181 in monkey B (fixation 1, 66% of the sites; fixation 2-6, 77%; Fig. S6) and monkey M (fixation 1, 45%;  
182 fixation 2-6, 51%) and at V4 recording sites as well (monkey B, fixation 1, 45%; fixation 2-6, 45%).  
183 We determined BoM latency by fitting a curve to the difference in activity elicited by the object  
184 borders and non-border image regions, averaged across contrast bins. We estimated latency as the  
185 time-point at which the fitted function reached the 33% of its maximum (see Methods)<sup>11,12,23</sup>. In V1,  
186 the BoM latency was 50ms in both fixation 1 and in later fixations. BoM latency was not significantly  
187 different from the latency of the visually driven response (49ms for fixation 1 and 29ms for later  
188 fixations), neither for fixation 1 nor for the later fixations (both  $ps > 0.05$ , bootstrap test). The same  
189 was true for V4 in both conditions (BoM: 59ms for fixation 1; 49ms for fixations 2-6; onset of  
190 response: 61ms for fixation 1; 54ms for fixations 2-6; both  $ps > 0.05$ , bootstrap test). We cannot  
191 directly compare latencies between fixation 1 and later fixations, because in fixation 1 the image  
192 replaced a grey background whereas the image moved through the receptive fields preceding the  
193 later fixations. We corrected for this difference by computing  $Lat_{BoM-Vis}$ , the difference between the  
194 BoM latency and the visual latency and compared it between fixation 1 and later fixations across

195 recording sites (Fig. S7).  $Lat_{BoM-Vis}$  did not differ between fixation 1 and fixations 2-6 ( $p > 0.05$ ,  
196 Wilcoxon signed-rank test; Fig. S7).

197 Next, we compared the response elicited by object interiors to that elicited by background regions  
198 (Fig. 4b). Regions that were part of objects elicited more activity in V1 and V4 than background  
199 regions, both during the first fixation and later fixations (all  $p$ s  $< 0.001$ , bootstrap test). Many V1  
200 recording sites exhibited OBM (monkey B, fixation 1, 41%, fixations 2-6, 52%; monkey M, fixation 1,  
201 67%, fixations 2-6, 36% of sites with  $p < 0.05$ , bootstrap test) and OBM was also present in V4  
202 (monkey B, fixation 1, 41% of sites in V4, fixations 2-6, 45%). Hence, OBM also occurs for natural  
203 images: image elements of objects elicit a stronger activity than those that are part of the  
204 background.

205 In V1, the latency of OBM during the first fixation was 78ms, which was later than the onset of the  
206 visually driven response ( $p < 0.05$ , bootstrap test). We next examined whether the OBM latency was  
207 shorter for later fixations, because the monkeys may have segmented the image in figure and  
208 background during the previous fixations. Interestingly, the median OBM latency across sites for  
209 fixations 2-6 was only 61ms, and not significantly different from the visually driven response and  
210 BoM ( $p > 0.05$ , bootstrap test). To correct for the difference in visual stimulation we computed  
211  $Lat_{OBM-Vis}$ , the difference between the latency of OBM and the visual response across recording sites.  
212 In V1,  $Lat_{OBM-Vis}$  was 13ms shorter during fixations 2-6 than during fixation 1 ( $p < 0.05$ , Wilcoxon  
213 signed-rank test; Fig. S7). In V4, the latency of OBM was later than the onset of visually driven  
214 response both for fixation 1 and fixations 2-6 (both  $p$ s  $< 0.05$ , bootstrap test). The difference in  
215  $Lat_{OBM-Vis}$  between the fixation periods was not significant, but we cannot exclude the possibility that  
216 this was caused by the smaller number of V4 recording sites.

217 The earlier OBM in V1 during fixations 2-6 suggests that it may have carried over from earlier  
218 fixations during which the monkeys had already recognized and segmented the objects, in  
219 accordance with previous studies demonstrating that image segmentation results can be remapped  
220 across saccades<sup>17,18</sup>.

a

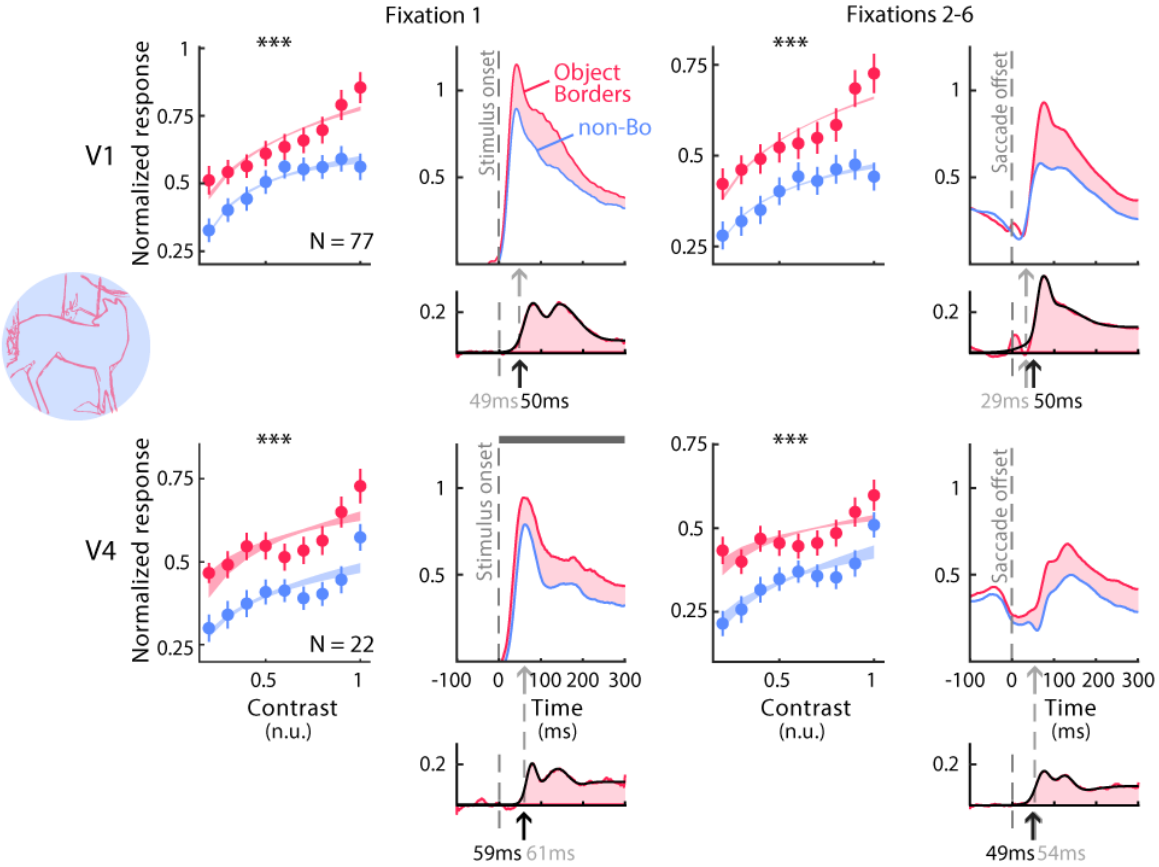

b

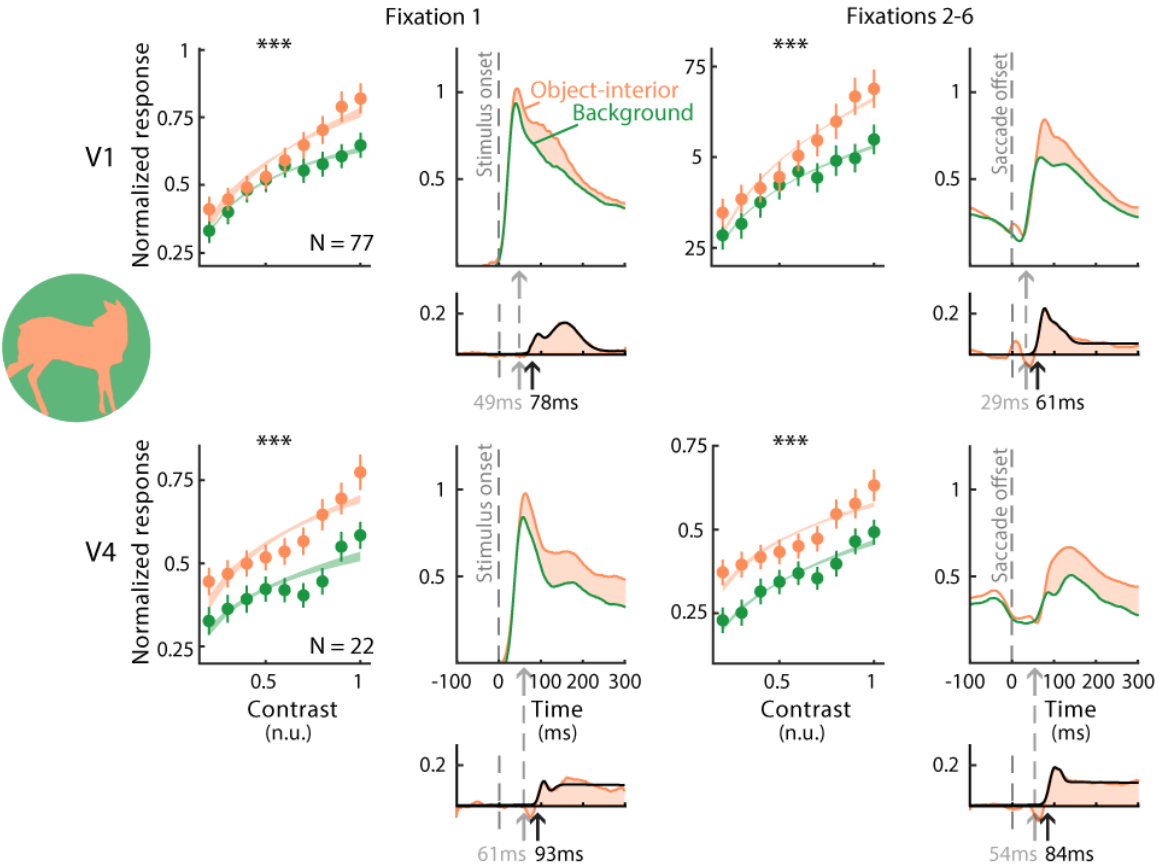

222 **Figure 4. Object borders and their interiors enhance the spiking activity of V1 and V4 neurons**  
223 **relative to background regions.**

224 **a**, Average CRFs (left) and MUA time-courses (averaged across contrast bins; right) in V1 (top row)  
225 and V4 (bottom row) for object-borders (red) and non-border image regions (blue). BoM is  
226 significant in both areas. Shaded regions around the CRFs denote 95% confidence intervals  
227 (determined by bootstrapping). Error bars indicate SEM across recording sites (\*\*\*,  $p < 0.001$ ,  
228 bootstrap test). **b**, CRFs and MUA time-course elicited by the object-interior (orange) and  
229 background (green). Black arrows indicate the latency of either BoM/OBM and gray arrows the  
230 latency of the visually driven response.  
231

232 BoM entails a comparison of the response elicited by object borders and other image elements,  
233 which were inside the objects or in the background, whereas OBM entails a comparison of image  
234 elements inside objects to background elements (Fig S3). BoM and OBM are not independent  
235 because both measures compare neuronal activity evoked by some of the object elements and  
236 background elements. We therefore also investigated the amount of unique variance in the activity  
237 of V1 and V4 neurons (time window 0-300ms) explained by BoM, OBM and contrast (Fig. 5a; see  
238 Methods). Each predictor explained a significant amount of unique variance in both areas and both  
239 fixation conditions (all  $ps < 0.001$ , t-test). In V1, contrast explained 41.0% of the variance, BoM 8.3%  
240 and OBM 5.5% during the first fixation and the values increased slightly to 44.8%, 10.1% and 6.4%  
241 for fixations 2-6, respectively. In V4, contrast explained 19.0%, BoM 21.4% and OBM 16.0% of the  
242 variance during the first fixation and these values were 20.8%, 21.1% and 35.0% for the later  
243 fixations. Hence, BoM and OBM accounted for a significant fraction of the explainable variance.  
244 Contrast explained less variance in V4 than in V1 whereas the contributions of BoM and OBM were  
245 larger in V4. It is of interest that the fraction of variance explained by OBM in V4 increased from  
246 16% for the first fixation to 35% for the later fixations. This result suggests that the extra activity  
247 elicited by the interior of objects builds up across between the first presentation of the image and  
248 subsequent eye movements, possibly because the scene is already known.

249

250 *The tuning of the early V1 response is selective for object borders*

251 We were surprised to find BoM in V1 at a latency of 50ms (Fig. 4a), because it is much earlier than  
252 the latency of ~95ms typically observed for elongated contours in synthetic images<sup>7</sup>. The longer  
253 BoM latency of previous studies is compatible with an effect of feedback from higher cortical areas  
254 to V1, but a latency of 50ms might be too short for such a feedback loop. An important difference  
255 between the present approach and previous studies with synthetic images is that we did not equate  
256 the features of contours that form the boundaries of objects and those that were in the background,  
257 even though contrasts were matched. We therefore hypothesized that object contours in natural  
258 images have other features, on average, than background contours<sup>9,24</sup>, which could explain the early  
259 BoM. In other words, some V1 neurons might be tuned to the features of object contours and  
260 extract them in their feedforward response, driven from within the RF.

261 We exploited recent advances in artificial neural networks (ANNs) to study the tuning of V1  
262 recording sites and to examine if it can account for the extra activity elicited by object boundaries<sup>25–</sup>  
263 <sup>27</sup>. As a model for V1 tuning we chose layer conv3\_1 of VGG-19 (and several other models, Fig. S8),  
264 which is the state of the art in predicting V1 responses to natural images<sup>28,29</sup>, and used a two-stage  
265 convolutional mapping to take both the spatial and feature selectivity of neurons at individual  
266 recording sites into account (see Methods)<sup>26</sup>. We confirmed previous studies<sup>28,29</sup> demonstrating  
267 that the ANN approach for the modeling of V1 tuning outperforms previous models (Fig. S8). To gain  
268 insight into the tuning of the V1 neurons and visualize their preferred features, according to the  
269 ANN model, we examined the synthetic images that maximized the model response. Figure 5c  
270 illustrates a few of these synthetic images (for illustration purposes; we did not present these  
271 images as stimuli). We then applied these RF models to an independent set of 100 natural images  
272 that had been annotated by human observers to examine if they indeed predicted extra activity for

273 object boundaries (Fig. 5b,c and S9). Specifically, we filtered the unseen images with the RF models  
274 (step 1 in Fig. 5b) and compared the filtered images to the human annotations (step 2 in Fig. 5b).  
275 For every recording site we determined their border detection performance (BoP), a measure that  
276 quantifies how well the V1 RF models predict the human-annotated borders (step 3 in Fig. 5b and  
277 Y-axis in Fig. 5c). BoP is an accuracy score that takes the uneven class distribution of salient and non-  
278 salient borders into account (F-measure, see Methods). Interestingly, 93% of the VGG-19 models of  
279 V1 tuning detected objected contours above chance level ( $p_s < 0.05$ , permutation test), which  
280 indicates that V1 tuning is indeed useful for boundary detection.

281 What is the relation between BoM elicited in V1 by the four pictures of our electrophysiological  
282 experiments and the BoP of the same recording sites for a different set of images? We computed  
283 the correlation between BoM in the early time-window (25-75ms: x-axis in Fig. 5c) and BoP (y-axis  
284 in Fig. 5c), across recording sites. The correlation coefficient was 0.25 ( $p = 0.037$ , t-test), indicating  
285 that V1 neurons that express BoM at an early latency are tuned to low-level feature differences that  
286 discriminate between object and non-object contours (Fig. 5c).

287 We next examined how much information about object contours is present across the recorded  
288 population of V1 neurons. We built a binary classifier based on the early (25-75ms) V1 activity in  
289 response to trials with object-contours or elements with the same contrast in the neurons' RF. To  
290 ensure that complex patterns signaling the presence of an object (e.g., the entire head of an animal)  
291 could not be detected by the RFs, we only included the 19 recording sites with smallest RFs ( $<1.5^\circ$ )  
292 in this analysis. Classification of object boundaries during single fixations had an accuracy of 73.5%,  
293 which is well above the chance level of 50% (Fig. 5d, top, red bar;  $p < 0.001$ , bootstrap test).  
294 Interestingly, when we used the activity of the entire conv3\_1 layer of the VVG-19 ANN to detect  
295 object-borders the accuracy was similar (Fig. 5d, bottom, red bar; 66.4%,  $p < 0.001$ , bootstrap test).



296 Hence, object-contours can be detected with a reasonable accuracy based on local information in  
297 individual RFs.

298 We carried out an extra experiment to confirm that the early BoM reflects V1 tuning rather than a  
299 contextual influence. We removed the context by copying circular image patches from the BSD that  
300 matched the V1 MUA RFs in size onto a grey background. We chose patches with a similar RMS  
301 contrast that did or did not contain an object border and centered them on the RFs of neurons at  
302 50 recording sites in monkey B (Fig. 5e). As predicted, patches with object borders elicited a slightly  
303 stronger V1 response than patches without object borders with the same contrast ( $p < 0.001$ ,  
304 Wilcoxon signed rank test; Fig. 5f,g). Hence, the tuning of V1 neurons indeed explains a fraction of  
305 the extra activity elicited by object boundaries.

306 Our finding that BoM is partially explained by V1 tuning begs the question of a possible contribution  
307 of V1 tuning to OBM, i.e. the extra activity by the object interior. We therefore also examined low-  
308 level differences between image elements of objects and backgrounds and built a binary (linear)  
309 classifier to discriminate between object and background regions, based on the early (25-75ms)  
310 response of the same 19 V1 recording sites as above, using trials with the same contrast. The  
311 classification accuracy during single fixations was 69.9% (Fig. 5d, top, orange bar;  $p < 0.001$ , bootstrap  
312 test) and it was in the same range for the conv3\_1 layer of VVG-19 (Fig. 5d, bottom, orange bar;  
313 74.0%,  $p < 0.001$ , bootstrap test). Thus, even though OBM emerges later than BoM, the activity of a  
314 small number of V1 neurons is enough to differentiate between features that characterize the  
315 interior of objects and the background.

316

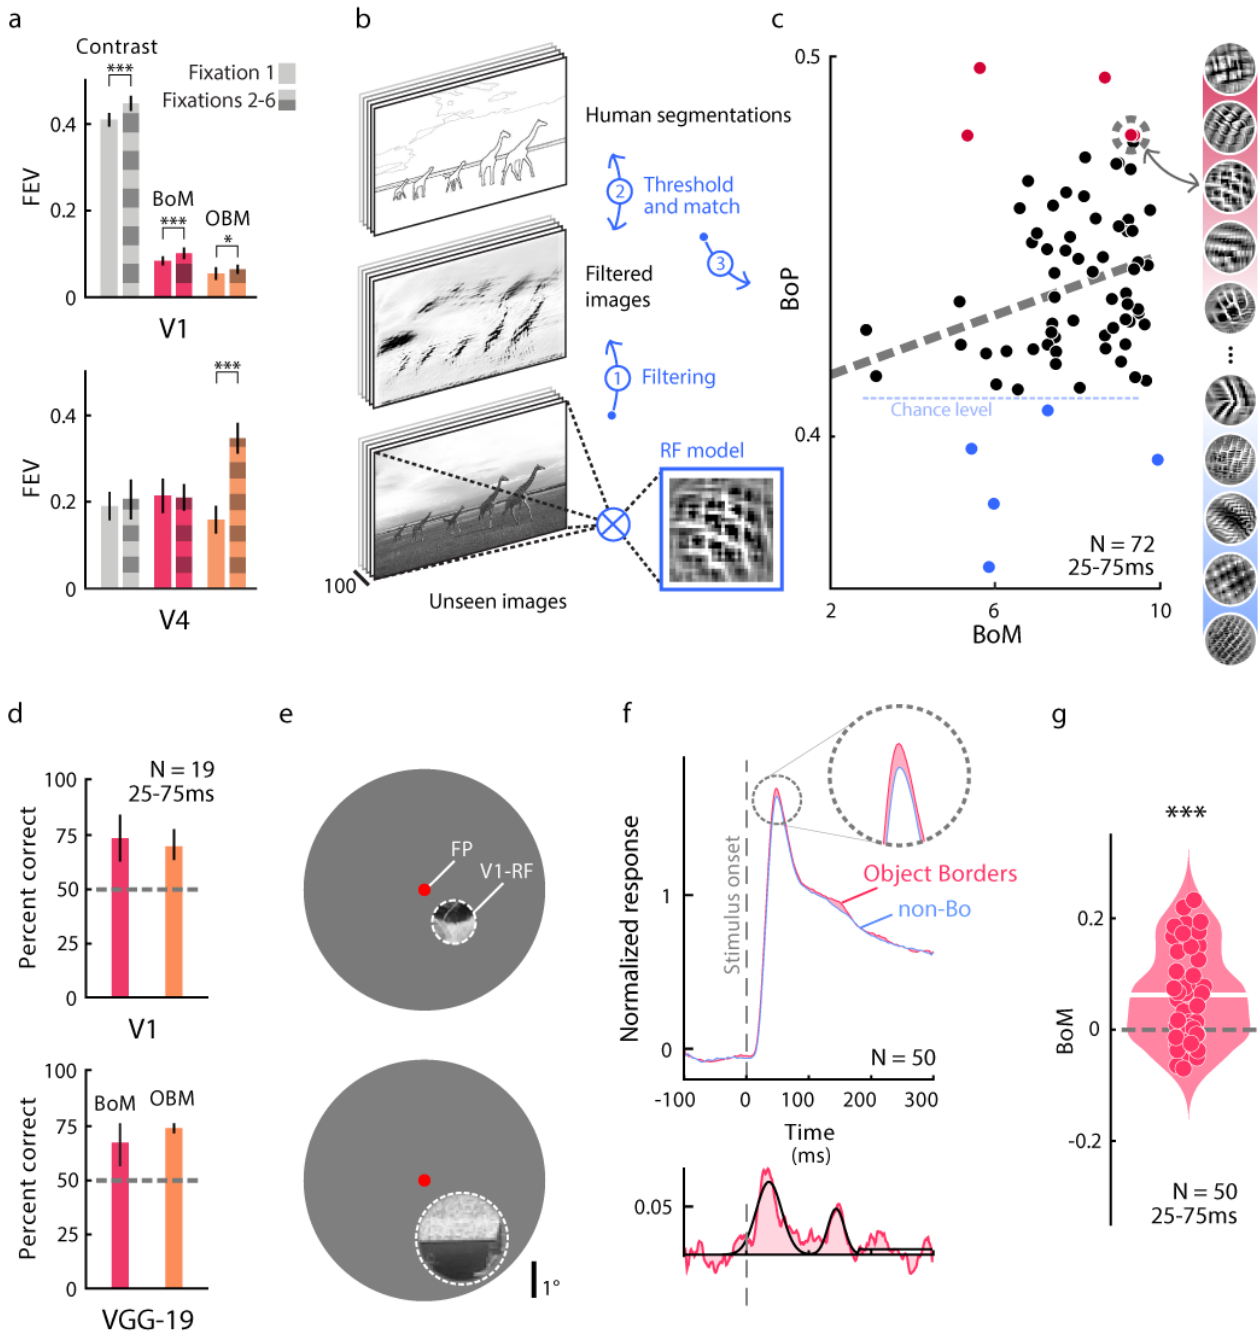

317

318 **Figure 5. Explained variance in V1 and V4 and V1 tuning during the onset response.**

319 **a**, Fraction of variance of V1 and V4 activity explained by contrast, BoM and OBM (0-300ms time  
 320 window) for fixation 1 and fixations 2-6 (\*\*\*:  $p < 0.001$ ; \*:  $p < 0.05$ , Wilcoxon signed rank). Error  
 321 bars denote SEM. **b**, We derived RF models for each V1 recording site using ANNs, and applied them  
 322 to a separate annotated set of natural images to examine how well they can detect object borders.  
 323 We calculated a measure of border-detection performance (BoP) for every V1 recording site. Step  
 324 1, applying the V1 tuning to the image. Step 2, thresholding of activity and correlation with human  
 325 judgements. Step 3, measurement of BoP of the V1 recording site. **c**, Correlation between BoM (x-  
 326 axis) and BoP (y-axis) across V1 recording sites ( $p < 0.05$ , parametric test). Blue dashed line,  
 327 significance threshold for border detection ( $p < 0.05$ , permutation test). **d**, Accuracy of binary

328 classifiers of object contours (red bar) and interiors (orange bar) based on the early response (25-  
329 75 ms) of 19 V1 sites (upper panel) or the VGG-19 conv3\_1 layer (lower panel). Classifiers detected  
330 object contours and interiors above chance level. Error bars denote 95% confidence intervals  
331 (determined by bootstrapping). **e**, Example isolated BSD image patches matching RFs of different  
332 V1 recording sites. **f**, Time-course of the V1 responses. Object borders elicited stronger early activity  
333 than non-border image patches. **g**, Distribution of early (25-75ms) BoM elicited by image patches  
334 across recording sites (white bar indicate the median BoM; \*\*\*,  $p < 0.001$ , Wilcoxon signed-rank  
335 test).

336

### 337 *Contextual BoM in natural images*

338 The early BoM in natural images is driven by the information in the RF. It differs from BoM in  
339 previous studies<sup>6,7</sup>, in which it was a contextual effect driven by information outside the neurons'  
340 RF. Does BoM also occur for natural images if the image elements in the RFs are kept the same? In  
341 a further experiment, we placed the RF of 98 V1 recording sites (68 in monkey B and 30 in monkey  
342 M) on object borders and other locations in 12 natural images from the BSD, while keeping the  
343 image patch in the RF constant (Fig. 6a). Specifically, we copied an image patch with an object border  
344 and pasted it at a background location to create a condition in which the same image patch is not  
345 perceived as object border. An example image is shown in Fig. 6a (left panel) where we copied a  
346 part of the back of the elephant into the background. On average, the object contours elicited a  
347 stronger V1 response than the same image patches presented at background locations ( $p < 0.001$ ,  
348 Wilcoxon signed-rank test across recording sites; Fig. 6b). The latency of BoM in this experiment was  
349 81ms, i.e. it now occurred during the delayed phase of the V1 response.

350 As a control, we placed the image patch at identical locations of synthetic metamers of these  
351 images. The metamers had the same orientations, phases, spatial frequencies, auto- and cross-  
352 correlations and marginal statistics, but the layout of objects was scrambled<sup>30</sup>. In the example  
353 metamer of Fig. 6a (middle and right panels), the transitions between water, trees and air were at  
354 the same locations but the elephant was removed (other example metamers are shown in Fig. S10).

355 BoM was absent for the metamers ( $p > 0.05$ , Wilcoxon signed-rank test). To investigate if the level  
356 of BoM differed between the metamers and the original images, we performed a repeated-  
357 measures two-way ANOVA with object-border and scrambling (2 levels each) as factors. The main  
358 effects of object-borders and scrambling were both significant (saliency,  $F_{1,97} = 28.6$ ,  $p < 0.001$ ;  
359 scrambling,  $F_{1,97} = 5.42$ ,  $p = 0.022$ ). Importantly, the interaction was also significant at the population  
360 level ( $F_{1,97} = 6.74$ ,  $p = 0.011$ ) and at many of the individual recording sites (at  $p < 0.05$ ; 40% of the  
361 sites in monkey B and 73% in monkey M). Hence, if RF stimulus is kept constant, contextual  
362 information enhances the V1 activity elicited by object borders, at a latency of  $\sim 80$ ms. These results,  
363 taken together, indicate that there are two processes that jointly explain the enhanced activity  
364 elicited by object boundaries. The tuning of V1 neurons enhances their representation from an early  
365 time point onwards and the scene context causes an additional activity increase at a longer latency.  
366

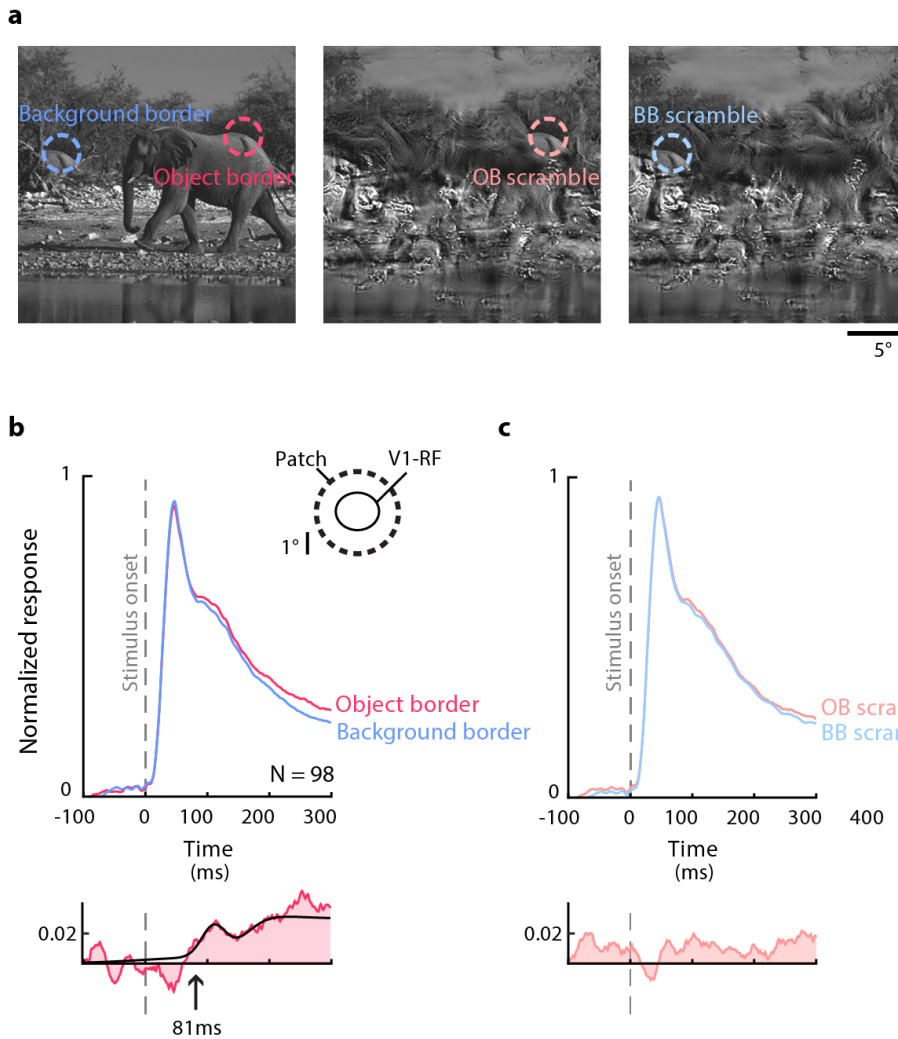

367

368

### Figure 6. Contextual BoM in V1.

369

370

371

372

373

374

375

376

377

### Discussion

378

379

380

We investigated how objects in natural images influence neuronal activity in early visual cortex and observed widespread influences of objecthood on neuronal activity in the human early visual cortex.

These results were mirrored by the early and late modulation of neuronal activity in areas V1 and

381 V4 of monkeys. Early influences were related to the tuning of the neurons, causing object  
382 boundaries to elicit more activity than background elements. However, if we held the image  
383 elements in the RF constant, image elements that were part of an object also elicited more activity  
384 than elements that were part of the background. This contextual influence manifested during a later  
385 phase of the neuronal response, which suggests the involvement of feedback from higher areas  
386 and/or horizontal interactions within visual areas. Whereas previous studies on figure-ground  
387 segregation and contour integration in early visual cortex used well-controlled, but artificial stimuli,  
388 the present results demonstrate that these findings generalize to natural vision. The results are in  
389 accordance with theories proposing that image elements of figures are labeled by enhanced  
390 neuronal activity in early visual cortex to segregate them from the background<sup>10,13,31</sup>.

391 Despite the different tasks and recording modalities between humans and monkeys, the neuronal  
392 responses in V1 were strikingly similar between the two species (Fig. S2). Our fMRI experiment  
393 revealed that BoM for natural images is present in V1 and other areas of early visual cortex. Object  
394 regions evoked stronger response than backgrounds in areas V1 and V2 but OBM did not reach  
395 significance in a number of higher areas, including hV4. In contrast, in the electrophysiological  
396 experiments in monkeys, OBM was present in V1 but even stronger in V4. This discrepancy may be  
397 related to differences between species, experimental setups and differences in spiking versus fMRI  
398 measures of neural activity<sup>22,32</sup>. Another relevant difference is the larger size of fMRI pRFs in hV4  
399 compared to neurophysiologically determined V4 RFs. The larger pRF sizes in hV4 may include more  
400 neurons with RFs not on the boundary and thereby dilute the BoM signal. Human fMRI allowed us  
401 to link the neural responses to human perception, and the monkey neurophysiological experiments  
402 allowed us to measure the timing of BoM and OBM and relate it to previous neurophysiological  
403 work with synthetic stimuli.

404

405 **Early and later object boundary signals**

406 Unexpectedly, natural images elicited BoM during the initial V1 response, at a latency of 50ms. This  
407 is much earlier than in previous studies that used well controlled, but artificial stimuli to keep the  
408 RF stimulus identical between salient and non-salient contour conditions<sup>6,7</sup>. In these previous  
409 studies, the contextual effects on neuronal firing rates were attributed to feedback from higher  
410 cortical areas and/or lateral connections within V1, which can inform neurons about information  
411 outside the RF. The synaptic and propagation delays associated with these recurrent routes explain  
412 why BoM occurs a few tens of ms after the initial V1 response<sup>13</sup>. Our results indicate that the early  
413 BoM signals evoked by natural images are not contextual but reflect the tuning of V1 neurons.  
414 Indeed, we found that features of object borders differ from those of non-border image regions (Fig.  
415 5c) and that V1 neurons are sensitive to these feature differences (Fig. 5d). On average, the object  
416 borders of a particular contrast elicit more activity than non-border image regions with the same  
417 contrast. The V1 tuning to object borders is more complex than can be described by Gabor  
418 filters<sup>25,28,33</sup> and is presumably related to a sensitivity to higher-order image statistics<sup>34-36</sup>, which  
419 also explain the early detection of boundaries in studies using synthetic figure-ground displays<sup>11</sup>  
420 (Fig. 1b).

421 In addition to their effect on the feedforward response, object boundaries also elicited a contextual  
422 influence on V1 activity. When we matched the image elements of object and non-object contours  
423 in the RF of V1 neurons, the activity elicited by the object contours was still stronger than that  
424 elicited by other, non-object contours (Fig. 6). BoM now occurred at a latency of 81ms, which is  
425 30ms later than the feedforward response and in line with previous studies that used synthetic  
426 stimuli to keep the RF content constant and controlled contour salience by the layout of image

427 elements in the RF surround<sup>6,7</sup>. This additional delay suggests that BoM now depended on feedback  
428 from higher areas and/or horizontal connections within V1. It is of interest that these putative  
429 feedback signals increased the activity elicited by contours that are predicted by an object's overall  
430 shape. This result is not in accordance with popular "predictive coding" schemes<sup>37</sup>, which suggest  
431 that feedback connections should suppress the activity of contours that are predicted by the  
432 object's shape. Instead, we found that object borders increase the neuronal activity in the visual  
433 cortex, both during the early and later phases of V1 response.

434 BoM is presumably related to border-ownership coding, which is expressed by many neurons in V2,  
435 V3, V4 and also by some V1 neurons<sup>38-40</sup>. The activity of neurons with border-ownership signals  
436 depends on the side of the figural region relative to the border that falls in the RF. For example, if  
437 the border is vertical, some neurons prefer that the border is owned by a figure on the left of it,  
438 whereas other neurons have the opposite preference. Hence, border-ownership neurons can link  
439 the shape of the border to the surface properties of the object's interior and may therefore play an  
440 important role in object recognition. In many situations, the local shape of a border falling in a RF  
441 can provide information about the side of the figure<sup>24</sup>. In these situations, neurons express border-  
442 ownership early, during the feedforward response. However, if the RF-stimulus is held constant,  
443 border-ownership coding occurs after an additional delay<sup>40</sup>. Although BoM reflects extra activity  
444 elicited by the object boundaries compared to less-relevant image elements, and thereby differs  
445 from border-ownership coding, it seems likely that the two effects are intimately related.

446

447 **Neuronal activity elicited by object interiors**



448 Image elements that were part of the interior of objects in the scene elicited more activity than  
449 background elements, both in human fMRI and monkey neurophysiology. This finding generalizes  
450 previous results on the neuronal mechanism of figure-ground perception to natural images (Fig.  
451 1b,c)<sup>10–12,16,41–46</sup>. Studies using synthetic stimuli revealed a number of successive processing phases  
452 for the processing of texture defined figure-ground stimuli (Fig. 1b, reviewed in ref.<sup>31</sup>). In V1, the  
453 first phase is the arrival of the input from the LGN at a latency of ~40ms. This is followed at a latency  
454 of ~60ms by boundary enhancement. Boundaries between figure and ground now elicit extra  
455 activity in V1, an effect that starts in the superficial layers of cortex<sup>41</sup>. The change in feature values  
456 at a boundary between figure and ground can be detected locally (e.g. there is an abrupt change in  
457 the texture as in Fig. 1b) and the mechanisms presumably overlap with early BoM (Fig. 7a). In a yet  
458 later phase, at a latency of ~90ms, V1 neurons that represent the figure's interior enhance their  
459 activity. Enhancement in the figure's interior is a genuine contextual effect, because the properties  
460 of the image elements that fall into the RF are often not informative about whether they belong to  
461 figure and ground (Fig. 1b,c). In these cases, the information that a RF falls on a figure comes from  
462 outside the RF. The relatively long latency of this figure-ground modulation is compatible with  
463 recurrent loops that may include horizontal connections within V1 and loops through the higher  
464 visual areas. Indeed, if activity in higher areas is blocked, figure-ground modulation in the center of  
465 the figure is diminished<sup>47,48</sup>, implying an important contribution of recurrent routes through higher  
466 visual cortical areas<sup>49</sup>. Interestingly, the optogenetic blockade of the late V1 activity phase with  
467 figure-ground modulation selectively impairs figure-ground perception, whereas contrast detection  
468 is unimpaired<sup>48</sup>.

469 The activity of image elements that were part of the interior of objects of natural images was  
470 enhanced in V1 at a latency of 78ms, which is 28ms after the visually driven response during the

471 first fixation. In V4 this OBM signal occurred at a latency of 93ms. We also observed systematic  
472 differences between the features of object interiors and those in the background, indicating that  
473 the tuning of V1 neurons could, in principle, discriminate between features of figure and  
474 background, even though the early V1 population response did not exhibit OBM.

475

#### 476 **Trans-saccadic integration**

477 Previous studies demonstrated that figure-ground signals for synthetic stimuli can persist across eye  
478 movements<sup>17,18</sup>. As a result, the figure-ground structure that is perceived during one fixation can be  
479 quickly reassigned to the appropriate neurons after all RFs shifted across the image due to the  
480 saccade. In the present study, OBM occurred sooner after the visually driven response for later  
481 fixations than for the first fixation. This result suggests that information about the location of object  
482 interiors is indeed carried over to the new fixation<sup>18</sup>, providing insight into the neuronal mechanisms  
483 for trans-saccadic integration in natural images<sup>17,50,51</sup>. One possible mechanism for the remapping  
484 of these response modulations in early visual cortex are neurons in parietal and frontal cortex that  
485 remap salient image elements and could provide feedback to lower areas after each saccade<sup>52-54</sup>.  
486 Another possible mechanism is provided by neurons that code the position of objects in non-  
487 retinotopic, e.g. head-centered coordinates<sup>55,56</sup>. These cells do not need to update their activity  
488 after an eye movement because object position relative to the head is independent of eye position.  
489 These neurons could feed the location of objects back to early visual cortex after a coordinate  
490 transformation from head to eye centered coordinates, based on the new, post-saccadic eye  
491 position. A final source for the early post-saccade OBM are neurons in areas of the temporal stream  
492 that code for the overall shape of objects. Many of these neurons are translation invariant, i.e. their  
493 activity depends little on the precise location of an object on the retina<sup>57</sup>. These neurons represent

494 object shape<sup>58</sup> and could provide feedback to boost the activity of neurons in lower areas that  
495 represent relevant shape features after a saccade.

496

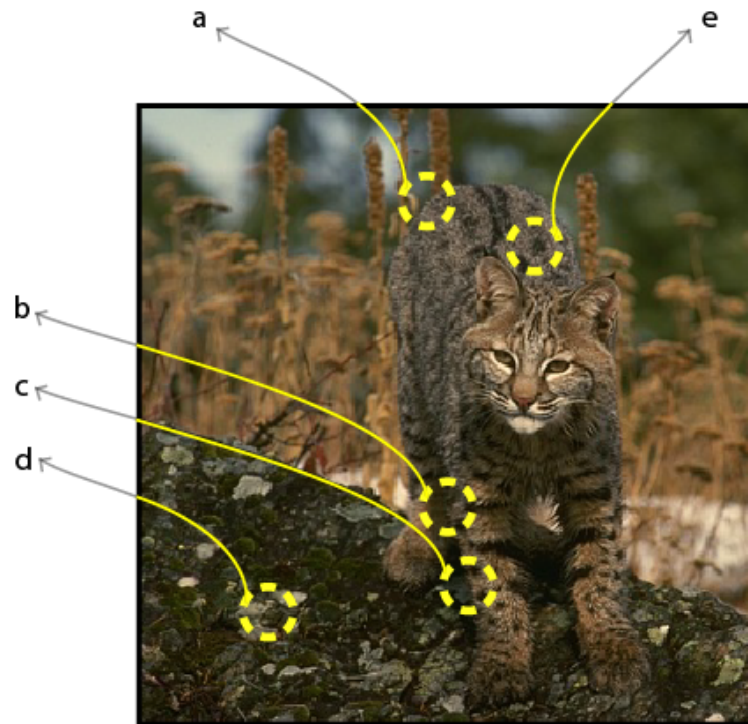

497

498 **Figure 7. Bottom-up and top-down mechanisms for object detection in natural vision**

499 Summary of the results. The local features of contour **a** suggest that is an object boundary. It can be  
500 detected bottom-up by tuning of V1 neurons. Image patches **b** and **c** have similar features but the  
501 context indicates that **c** contains an object boundary and **b** does not. Image patches **d** and **e** have  
502 similar features, but only **e** is part of the interior of the animal.

503

504 **Conclusion**

505 We conclude that the object boundaries and object interiors of natural images increase neuronal  
506 activity in the visual cortex. The extra neuronal activity occurs early if the local image elements in  
507 the RF have a high degree of “objecthood” and at a later point in time if it depends on contextual  
508 information outside the RF. OBM and BoM play an important role in perceptual organization<sup>13</sup>, the  
509 process that groups image elements of the same object together and segregates them from other

510 objects and the background by labeling the object features with enhanced neuronal activity<sup>13,59–63</sup>.

511 The presence of these cortical image parsing signals for natural images suggest that they play a role

512 during each fixation of our everyday vision, opening many avenues for future research.

513

## 514 **Acknowledgments**

515 We thank Kor Brandsma and Anneke Ditewig for biotechnical support. The work was supported by

516 the European Union's Horizon 2020 and FP7 Research and Innovation Program (Framework

517 Partnership Agreement No. 650003 [HBP FPA]) to PR, the European Union's Erasmus+ program

518 (grant agreement: 2018-1-IT02-KA103-047276/10) to PP and the Netherlands Organization for

519 Scientific Research (NWO) Vidi (452.08.008) and Vici (016.vici.185.050) to SD.

520

## 521 **References**

522 1. Martin, D., Fowlkes, C., Tal, D. & Malik, J. A database of human segmented natural images

523 and its application to evaluating segmentation algorithms and measuring ecological

524 statistics. in *Proceedings of the IEEE International Conference on Computer Vision* vol. 2

525 416–423 (Iccv Vancouver:, 2001).

526 2. Zuiderbaan, W., van Leeuwen, J. & Dumoulin, S. O. Change Blindness Is Influenced by Both

527 Contrast Energy and Subjective Importance within Local Regions of the Image. *Front Psychol*

528 **8**, 1718 (2017).

529 3. Neri, P. Object segmentation controls image reconstruction from natural scenes. *PLoS Biol*

530 **15**, e1002611 (2017).

531 4. Self, M. W., Mookhoek, A., Tjalma, N. & Roelfsema, P. R. Contextual effects on perceived

532 contrast: figure-ground assignment and orientation contrast. *Journal of Vision* **15**, 2 (2015).

- 533 5. Papale, P. *et al.* Foreground-background segmentation revealed during natural image  
534 viewing. *eNeuro* **5**, (2018).
- 535 6. Li, W., Piech, V. & Gilbert, C. D. Contour saliency in primary visual cortex. *Neuron* **50**, 951–  
536 962 (2006).
- 537 7. Chen, M. *et al.* Incremental integration of global contours through interplay between visual  
538 cortical areas. *Neuron* **82**, 682–694 (2014).
- 539 8. Sigman, M., Cecchi, G. A., Gilbert, C. D. & Magnasco, M. O. On a common circle: natural  
540 scenes and Gestalt rules. *Proc Natl Acad Sci U S A* **98**, 1935–1940 (2001).
- 541 9. Geisler, W. S., Perry, J. S., Super, B. J. & Gallogly, D. P. Edge co-occurrence in natural images  
542 predicts contour grouping performance. *Vision Res* **41**, 711–724 (2001).
- 543 10. Lamme, V. A. The neurophysiology of figure-ground segregation in primary visual cortex. *J*  
544 *Neurosci* **15**, 1605–1615 (1995).
- 545 11. Poort, J. *et al.* The role of attention in figure-ground segregation in areas V1 and V4 of the  
546 visual cortex. *Neuron* **75**, 143–156 (2012).
- 547 12. Poort, J., Self, M. W., van Vugt, B., Malkki, H. & Roelfsema, P. R. Texture Segregation Causes  
548 Early Figure Enhancement and Later Ground Suppression in Areas V1 and V4 of Visual  
549 Cortex. *Cereb Cortex* **26**, 3964–3976 (2016).
- 550 13. Roelfsema, P. R. Cortical algorithms for perceptual grouping. *Annu Rev Neurosci* **29**, 203–  
551 227 (2006).
- 552 14. Roelfsema, P. R. & Houtkamp, R. Incremental grouping of image elements in vision. *Atten*  
553 *Percept Psychophys* **73**, 2542–2572 (2011).
- 554 15. Felsen, G. & Dan, Y. A natural approach to studying vision. *Nature Neuroscience* **8**, 1643–  
555 1646 (2005).

- 556 16. Self, M. W. *et al.* The Segmentation of Proto-Objects in the Monkey Primary Visual Cortex.  
557 *Curr Biol* **29**, 1019-1029 e4 (2019).
- 558 17. Khayat, P. S., Spekreijse, H. & Roelfsema, P. R. Correlates of transsaccadic integration in the  
559 primary visual cortex of the monkey. *Proc Natl Acad Sci U S A* **101**, 12712–12717 (2004).
- 560 18. O’Herron, P. & von der Heydt, R. Remapping of border ownership in the visual cortex. *J*  
561 *Neurosci* **33**, 1964–1974 (2013).
- 562 19. Dumoulin, S. O. & Wandell, B. A. Population receptive field estimates in human visual  
563 cortex. *NeuroImage* **39**, 647–660 (2008).
- 564 20. Zuiderbaan, W., Harvey, B. M. & Dumoulin, S. O. Image identification from brain activity  
565 using the population receptive field model. *PLoS ONE* **12**, e0183295 (2017).
- 566 21. Arbelaez, P., Maire, M., Fowlkes, C. & Malik, J. Contour detection and hierarchical image  
567 segmentation. *IEEE Trans Pattern Anal Mach Intell* **33**, 898–916 (2011).
- 568 22. Self, M. W., van Kerkoerle, T., Goebel, R. & Roelfsema, P. R. Benchmarking laminar fMRI:  
569 Neuronal spiking and synaptic activity during top-down and bottom-up processing in the  
570 different layers of cortex. *NeuroImage* **197**, 806–817 (2019).
- 571 23. Roelfsema, P. R., Khayat, P. S. & Spekreijse, H. Subtask sequencing in the primary visual  
572 cortex. *Proc Natl Acad Sci U S A* **100**, 5467–5472 (2003).
- 573 24. Fowlkes, C. C., Martin, D. R. & Malik, J. Local figure-ground cues are valid for natural images.  
574 *Journal of Vision* **7**, 2 (2007).
- 575 25. Walker, E. Y. *et al.* Inception loops discover what excites neurons most using deep  
576 predictive models. *Nature Neuroscience* (2019) doi:10.1038/s41593-019-0517-x.
- 577 26. Bashivan, P., Kar, K. & DiCarlo, J. J. Neural population control via deep image synthesis.  
578 *Science* (2019) doi:10.1126/science.aav9436.

- 579 27. Klindt, D. A., Ecker, A. S., Euler, T. & Bethge, M. Neural system identification for large  
580 populations separating “what” and “where.” in *Advances in Neural Information Processing*  
581 *Systems* (2017). doi:10.12751/nncn.bc2017.0132.
- 582 28. Cadena, S. A. *et al.* Deep convolutional models improve predictions of macaque V1  
583 responses to natural images. *PLOS Comput Biol* **15**, e1006897 (2019).
- 584 29. Zhang, Y., Lee, T. S., Li, M., Liu, F. & Tang, S. Convolutional neural network models of V1  
585 responses to complex patterns. *J Comput Neurosci* **46**, 33–54 (2019).
- 586 30. Portilla, J. & Simoncelli, E. P. A parametric texture model based on joint statistics of complex  
587 wavelet coefficients. *International Journal of Computer Vision* **40**, 49–70 (2000).
- 588 31. Roelfsema, P. R. & de Lange, F. P. Early Visual Cortex as a Multiscale Cognitive Blackboard.  
589 *Annu Rev Vis Sci* **2**, 131–151 (2016).
- 590 32. O’Herron, P. *et al.* Neural correlates of single-vessel haemodynamic responses in vivo.  
591 *Nature* **534**, 378–382 (2016).
- 592 33. Tang, S. *et al.* Complex Pattern Selectivity in Macaque Primary Visual Cortex Revealed by  
593 Large-Scale Two-Photon Imaging. *Curr Biol* **28**, 38-48 e3 (2018).
- 594 34. Johnson, A. P. & Baker, C. L. First- and second-order information in natural images: a filter-  
595 based approach to image statistics. *Journal of the Optical Society of America A* **21**, 913  
596 (2004).
- 597 35. Dimattina, C. & Baker, C. L. Modeling second-order boundary perception: A machine  
598 learning approach. *PLoS Computational Biology* **15**, e1006829 (2019).
- 599 36. Mareschal, I. & Baker, C. L. A cortical locus for the processing of contrast-defined contours.  
600 *Nature Neuroscience* **1**, 150–154 (1998).

- 601 37. Friston, K. A theory of cortical responses. *Philosophical Transactions of the Royal Society B:*  
602 *Biological Sciences* **360**, 815–836 (2005).
- 603 38. Williford, J. R. & von der Heydt, R. Figure-Ground Organization in Visual Cortex for Natural  
604 Scenes. *eNeuro* **3**, (2016).
- 605 39. Zhou, H., Friedman, H. S. & von der Heydt, R. Coding of border ownership in monkey visual  
606 cortex. *J Neurosci* **20**, 6594–6611 (2000).
- 607 40. Hesse, J. K. & Tsao, D. Y. Consistency of Border-Ownership Cells across Artificial Stimuli,  
608 Natural Stimuli, and Stimuli with Ambiguous Contours. *J Neurosci* **36**, 11338–11349 (2016).
- 609 41. Self, M. W., van Kerkoerle, T., Super, H. & Roelfsema, P. R. Distinct roles of the cortical  
610 layers of area V1 in figure-ground segregation. *Curr Biol* **23**, 2121–2129 (2013).
- 611 42. Scholte, H. S., Jolij, J., Fahrenfort, J. J. & Lamme, V. A. Feedforward and recurrent processing  
612 in scene segmentation: electroencephalography and functional magnetic resonance  
613 imaging. *J Cogn Neurosci* **20**, 2097–2109 (2008).
- 614 43. Super, H., Spekreijse, H. & Lamme, V. A. Two distinct modes of sensory processing observed  
615 in monkey primary visual cortex (V1). *Nature Neuroscience* **4**, 304–310 (2001).
- 616 44. Zipser, K., Lamme, V. A. & Schiller, P. H. Contextual modulation in primary visual cortex. *J*  
617 *Neurosci* **16**, 7376–7389 (1996).
- 618 45. Likova, L. T. & Tyler, C. W. Occipital network for figure/ground organization. *Exp Brain Res*  
619 **189**, 257–267 (2008).
- 620 46. Poltoratski, S. & Tong, F. Resolving the spatial profile of figure enhancement in human V1  
621 through population receptive field modeling. *Journal of Neuroscience* (2020)  
622 doi:10.1523/JNEUROSCI.2377-19.2020.



- 623 47. Klink, P. C., Dagnino, B., Gariel-Mathis, M. A. & Roelfsema, P. R. Distinct Feedforward and  
624 Feedback Effects of Microstimulation in Visual Cortex Reveal Neural Mechanisms of Texture  
625 Segregation. *Neuron* **95**, 209-220 e3 (2017).
- 626 48. Kirchberger, L. *et al.* The essential role of recurrent processing for figure-ground perception  
627 in mice. *Science Advances* **7**, (2021).
- 628 49. Kar, K., Kubiľius, J., Schmidt, K., Issa, E. B. & DiCarlo, J. J. Evidence that recurrent circuits are  
629 critical to the ventral stream’s execution of core object recognition behavior. *Nature*  
630 *Neuroscience* **22**, 974–983 (2019).
- 631 50. McConkie, G. W. & Currie, C. B. Visual stability across saccades while viewing complex  
632 pictures. *J Exp Psychol Hum Percept Perform* **22**, 563–581 (1996).
- 633 51. Irwin D.J., D. E. ; G. Eye movements, attention and trans-saccadic memory. *J Visual*  
634 *Cognition* **5**, 127–155 (1998).
- 635 52. Gottlieb, J. P., Kusunoki, M. & Goldberg, M. E. The representation of visual salience in  
636 monkey parietal cortex. *Nature* **391**, 481–484 (1998).
- 637 53. Duhamel, J. R., Colby, C. L. & Goldberg, M. E. The updating of the representation of visual  
638 space in parietal cortex by intended eye movements. *Science* **255**, 90–92 (1992).
- 639 54. Umeno, M. M. & Goldberg, M. E. Spatial processing in the monkey frontal eye field. I.  
640 Predictive visual responses. *J Neurophysiol* **78**, 1373–1383 (1997).
- 641 55. Duhamel, J. R., Bremmer, F., ben Hamed, S. & Graf, W. Spatial invariance of visual receptive  
642 fields in parietal cortex neurons. *Nature* **389**, 845–848 (1997).
- 643 56. Graziano, M. S., Yap, G. S. & Gross, C. G. Coding of visual space by premotor neurons.  
644 *Science* **266**, 1054–1057 (1994).

- 645 57. Tovee, M. J., Rolls, E. T. & Azzopardi, P. Translation invariance in the responses to faces of  
646 single neurons in the temporal visual cortical areas of the alert macaque. *J Neurophysiol* **72**,  
647 1049–1060 (1994).
- 648 58. Bao, P., She, L., McGill, M. & Tsao, D. Y. A map of object space in primate inferotemporal  
649 cortex. *Nature* **583**, 103–108 (2020).
- 650 59. Lamme, V. A. & Roelfsema, P. R. The distinct modes of vision offered by feedforward and  
651 recurrent processing. *Trends Neurosci* **23**, 571–579 (2000).
- 652 60. Houtkamp, R. & Roelfsema, P. R. Parallel and serial grouping of image elements in visual  
653 perception. *J Exp Psychol Hum Percept Perform* **36**, 1443–1459 (2010).
- 654 61. Pooresmaeili, A. & Roelfsema, P. R. A growth-cone model for the spread of object-based  
655 attention during contour grouping. *Curr Biol* **24**, 2869–2877 (2014).
- 656 62. Korjoukov, I. *et al.* The time course of perceptual grouping in natural scenes. *Psychol Sci* **23**,  
657 1482–1489 (2012).
- 658 63. Jeurissen, D., Self, M. W. & Roelfsema, P. R. Serial grouping of 2D-image regions with  
659 object-based attention in humans. *Elife* **5**, (2016).
- 660
- 661

662 **Methods**

663 **fMRI experiment with human participants**

664

665 *Subjects*

666 Four participants (all male; ages 29-41 years) participated in the fMRI experiment. All participants  
667 had normal or corrected-to-normal visual acuity. We obtained informed written consent of the  
668 participants and the protocol was approved by the Human Ethics Committee of University Medical  
669 Center Utrecht.

670

671 *Stimulus presentation*

672 The visual stimuli were generated in Matlab (Mathworks Inc.) using the PsychToolbox<sup>64,65</sup> on a  
673 Macintosh MacBook Pro. The stimuli were back-projected on a display inside the MRI bore. The  
674 subject viewed the display through mirrors inside the scanner. The size of the display was  
675 15.0x7.9cm with a resolution of 1024x538 pixels. The total distance from the subject's eyes to the  
676 display was 41cm. The stimuli were constrained to a circular area (radius, 5.5°) with the size of the  
677 vertical dimension of the screen. The area outside this circle was maintained at a constant mean  
678 luminance.

679

680 *Population receptive field (pRF) mapping stimulus*

681 We used bar apertures filled with natural images<sup>19,20</sup> (Fig. S2) to train the pRF-model. The width of  
682 the bar subtended 1/4th of the stimulus radius (1.375°). Four bar orientations (0°, 45°, 90° and 135°)  
683 and two different step directions for each bar were used, giving a total of 8 bar directions within a  
684 given scan. The bar stepped across the stimulus aperture in 20 steps (with a distance of 0.55° and a

685 duration of 1.5 seconds per bar position) so that each pass took 30 seconds. A period of 30 seconds  
686 mean-luminance (0% contrast) was presented after every pass. In total there were 4 blocks of mean-  
687 luminance during each scan, presented at evenly spaced intervals. The participants performed a  
688 fixation dot task to make sure they fixated at the center of the display. A small fixation dot (0.11°  
689 radius) was presented in the middle of the stimulus. The fixation dot changed its color from red to  
690 green at random time intervals and subjects were instructed to respond to color changes using a  
691 button press.

692

### 693 *Natural images*

694 The natural images came from the BSD<sup>1,21</sup>. The original resolution of the images was 321x481 pixels  
695 (both landscape and portrait). In the fMRI experiments<sup>20</sup>, we selected a square region of 321x321  
696 pixels from the images and upsampled it to a resolution of 516x516 pixels, which corresponds to a  
697 stimulus of 11x11° diameter of visual angle. The images were masked by a circle with a raised cosine  
698 faded edge (width of 0.9°), and the areas outside this circle were set to the mean luminance. The  
699 images were gamma-linearized and the mean contrast was set to 50%. We used 3 image sets in  
700 different scanning runs, each containing 15 different natural images (45 in total) and one full-field  
701 binarized bandpass-filtered noise stimulus. Figure S1 shows the image set. A fixation dot was  
702 presented at the center of the stimulus. We used the same fixation dot task as for the pRF mapping  
703 runs.

704

### 705 *Functional imaging and processing*

706 The MRI data was acquired with a Philips 7T scanner using a 32-channel head-coil<sup>20</sup>. We scanned  
707 the participants with a 2d-echo-planar-imaging sequence with 25 slices oriented perpendicular to

708 the calcarine sulcus with no gap. The following parameters were used; repetition time (TR) =  
709 1500ms, echo time (TE) = 25ms and a flip angle of 80°. The functional resolution was 2x2x2mm and  
710 the field of view (FOV) was 190x190x50mm. We used foam padding to minimize head movement.  
711 The functional images were corrected for head movement between and within the scans<sup>66</sup>. For  
712 computation of the head movement between scans, the first functional volumes for each scan were  
713 aligned. Within scan motion correction was then computed by aligning the frames of a scan to the  
714 first frame. The duration of the pRF mapping scans was 372 seconds (248 time-frames), of which  
715 the first 12 seconds (8 time-frames) were discarded to eliminate start-up magnetization transients.  
716 During the three sessions we acquired 6-8 pRF mapping scans in total per subject. To obtain a high  
717 signal-to-noise ratio, we averaged across the repeated scans. During the three sessions in which we  
718 presented the natural images we acquired 6-7 scans for each of the three stimulus sets. The duration  
719 of the scans with the natural images was 432 seconds (288 time-frames). The first 12 seconds (8  
720 time-frames) were discarded to eliminate start-up magnetization transients. The images were  
721 presented in a block design. Each image was presented during a 9-second block. Within this block  
722 the same image was shown 18 times for a duration of 300ms followed by 200ms mean-luminance.  
723 The full-field stimuli were presented with 3 alternating different high-contrast patterns, to obtain a  
724 full high-contrast response that is not based upon one specific high-contrast pattern (Fig. S2b).  
725 Specifically, the phase of the full-field pattern was randomized on different presentations in order  
726 to obtain a response that is not influenced by one specific dartboard pattern. The block in which the  
727 stimulus was presented was followed by a 12 second mean-luminance presentation. Four longer  
728 blank periods of 33 seconds were also included during the scan.

729

730 *Anatomical imaging and processing*

731 The T1-weighted MRI images were acquired in a separate session using an 8-channel SENSE head-  
732 coil. The following parameters were used: TR/TE/flip angle = 9.88/4.59/8. The scans were acquired  
733 at a resolution of 0.79x0.80x0.80mm and were resampled to a resolution of 1mm<sup>3</sup> isotropic. The  
734 functional MRI scans were aligned with the anatomical MRI using an automatic alignment  
735 technique<sup>66</sup>. From the anatomical MRI, white matter was automatically segmented using the  
736 FMRIB's Software Library (FSL)<sup>67</sup>. After the automatic segmentation it was hand-edited to minimize  
737 segmentation errors<sup>68</sup>. The gray matter was grown from the white matter to form a 4mm layer  
738 surrounding the white matter. A smoothed 3D cortical surface can be rendered by reconstruction  
739 of the cortical surface at the border of the white and gray matter<sup>69</sup>.

740

#### 741 *pRF model-based analysis*

742 The pRF-model was estimated for every cortical location from the measured fMRI signal that was  
743 elicited by the pRF mapping bar stimuli (Fig. S2a)<sup>19,20</sup>. In short, the method estimates the pRF by  
744 combining the measured fMRI time-series with the position time course of the visual stimulus. A  
745 prediction of the time-series is made by calculating the overlap of the pRF and the stimulus energy  
746 (RMS contrast, see below) convolved with the hemodynamic response function (HRF). We  
747 estimated the parameters of the HRF that best describes the data of the whole acquired fMRI  
748 volume<sup>70</sup>. The optimal parameters of the pRF-model are chosen by minimizing the residual sum of  
749 squares between the predicted and the measured time-series. We used the conventional pRF-  
750 model, which consists of a circular symmetric Gaussian. This model has four parameters: position  
751 (x, y), size ( $\sigma$ ) and amplitude ( $\beta$ ). For further technical and implementation details see<sup>19</sup>.

752

#### 753 *Regions of interest*

754 We used the pRF-method to estimate position parameters  $x$ , and  $y$  of the pRF of every voxel. From  
755 these values, we derived the polar angle ( $atan(y_0/x_0)$ ) and eccentricity ( $\sqrt{x_0^2 + y_0^2}$ ) values. We drew  
756 the borders between visual field maps on the basis<sup>71</sup> polar angle and eccentricity maps on the  
757 inflated cortical surface<sup>69</sup>. We defined visual areas V1, V2, V3, hV4, LO-1/2 and V3-a/b as our regions  
758 of interest (ROIs)<sup>71-74</sup>.

759

### 760 *Analysis of fMRI responses to the natural images*

761 We measured fMRI responses to 45 natural images (Fig. S1) and 3 full-field high contrast stimuli  
762 (100% contrast; Figure S2)<sup>20</sup>. We first determined the voxel response amplitudes in %BOLD signal  
763 change elicited by each of these images. The voxel responses were calculated using a general linear  
764 model (GLM)<sup>75,76</sup>. To reduce the noise from the individual voxel differences in response amplitudes,  
765 we normalized the responses to the voxel's response to the full-field (100% contrast) stimulus.

766 To determine the contrast response function (CRF), we only used the voxels with an overall  
767 significant response (t-values > 4.0), a pRF eccentricity between 0.5 and 4° and for which the pRF  
768 model explained more than 40% of the variance. Based on previous work, for every area we used a  
769 threshold for the pRF sizes<sup>19,70,77,78</sup>. In V1 we included pRFs with a value of  $\sigma$  (which determines pRF  
770 size) between 0.25° and 0.8°, for V2 between 0.25° and 1.1°, for V3 between 0.25° and 1.75°, for  
771 hV4 between 0.45° and 3°, for V3ab between 0.45° and 3.75° and for and LO12 between 0.9° and  
772 5°.

773 To derive the CRF, we computed the contrast of every natural image within each pRF. The pRF of  
774 voxels was modeled as a circular symmetric Gaussian function, described by parameters for position  
775 ( $x_c, y_c$ ) and size ( $\sigma$ ), giving rise to a Gaussian weighting function  $w_i$ :

776 
$$w_i = \exp\left(\frac{(x_i - x_c)^2 + (y_i - y_c)^2}{2\sigma^2}\right) \quad (1)$$

777 Where  $x_c$  and  $y_c$  define the location of the center of the pRF in the visual field,  $\sigma$  determines the size  
778 of the pRF and  $x_i$  and  $y_i$  define the location of the  $i$ -th pixel. We computed each voxel's contrast  
779 value to each natural image by calculating the Root-Mean-Squared (RMS) contrast<sup>65,79</sup> of the part  
780 of the image inside the voxel's pRF. RMS contrast was defined as the standard deviation of the  
781 luminance of the pixels relative to the mean. The RMS-contrast was weighted by the pRF Gaussian  
782 function to obtain the local contrast-energy value per pRF:

783 
$$\text{local contrast energy} = \sqrt{\frac{1}{\sum_{i=1}^N w_i} \sum_{i=1}^N w_i \frac{(L_i - L)^2}{L^2}} \quad (2)$$

784 Where  $N$  is the number of pixels in the stimulus window.  $L$  is the mean luminance from the pixels  
785 inside the spatial window, and  $L_i$  is the luminance of the  $i$ -th pixel<sup>2</sup>.

786 We computed the CRF of voxels areas V1, V2, V3, hv4, LO-1/2 and V3-a/b by measuring the fMRI  
787 responses as a function of the contrast inside the pRF. We chose contrast bins such that every bin  
788 contained 10% of the voxels and fitted the following equation (modified from ref.<sup>80</sup>):

789 
$$R(C) = a \frac{C^q}{C^q + Q^q} \quad (3)$$

790 where  $R$  is the fMRI response,  $C$  is the RMS-contrast inside the pRF,  $Q$  represents the contrast value  
791 where the CRF is at half of its maximum response, and  $q$  determines the slope ( $Q$  and  $q$  are free  
792 parameters).

793

#### 794 *Quantification of BoM and OBM*

795 The BSD images are annotated by 5-9 human observers who drew lines to identify borders that are  
796 important for the scene's representation<sup>1,21</sup>. We used these measurements to define the perceived



797 boundaries, which are salient boundaries of the scene. Every pixel  $i$  of the manually labeled images  
798 have values for the degree of agreement between observers,  $S_i$ , between 0 (not labeled by any  
799 observer) and 1 (labeled by all observers). The border-saliency in the pRF is calculated as a weighted  
800 sum across pixels:

$$801 \quad \textit{Perceived border} = \frac{\sum_{i=1}^N w_i \cdot S_i}{\sum_{i=1}^N w_i} \quad (4)$$

802 Here  $w_i$  are the weights of the RF estimate (equation 1) and  $N$  is the total number of pixels in the  
803 RF. We used the same method to quantify the degree to which a pixel was part of an object or the  
804 background (Fig. 1e). Pixels that were as part of an object, had a value of 1 and pixels that were part  
805 of the background had a value of 0. We selected a segmentation covering the objects of a scene  
806 from one of the BSD subjects, and then considered everything else as background<sup>5</sup>. We excluded 3  
807 of the 45 images in the OBM analysis because the object in the image almost filled the entire scene.  
808 We split the voxels based on objecthood values inside the pRFs. We included the lowest 25 percent  
809 responses as non-perceived borders/background and the highest 25 percent as perceived-  
810 borders/object-interior and computed the CRFs within these voxel classes.

811

## 812 *Statistics*

813 We used a bootstrapping procedure to determine the significance of differences in CRFs between  
814 conditions. We sampled the images with replacement 1000 times, fit the CRF for the two simulated  
815 conditions and computed the mean difference. We derived the p-value from this null distribution.

816

## 817 **Electrophysiological experiments in monkeys**

818 *Training of the monkeys*

819 All procedures complied with the NIH Guide for Care and Use of Laboratory Animals and were  
820 approved by the institutional animal care and use committee of the Royal Netherlands Academy of  
821 Arts and Sciences. Two macaque monkeys (males, 7 and 13 years old) participated in the  
822 electrophysiological experiments. They were socially housed in stable pairs in a specialized primate  
823 facility with natural daylight, controlled humidity and temperature. The home-cage was a large  
824 floor-to-ceiling cage which allowed natural climbing and swinging behavior. The cage had a solid  
825 floor, covered with sawdust and was enriched with toys and foraging items. Their diet consisted of  
826 monkey chow supplemented with fresh fruit. Their access to fluid was controlled, according to a  
827 carefully designed regime for fluid uptake. During weekdays the animals received water or diluted  
828 fruit juice in the experimental set-up upon correctly performed trials. We ensured that the animals  
829 drank sufficient fluid in the set-up and supplemented extra fluid after the recording session if they  
830 did not drink enough. On days of the weekend, they received at least 700ml water in the home-cage  
831 in a drinking bottle. The animals were regularly checked by veterinary staff and animal caretakers  
832 and their weight and general appearance were recorded daily in an electronic logbook during fluid-  
833 control periods.

834

### 835 *Surgical details*

836 We implanted both monkeys with a titanium head-post (Crist instruments) under aseptic conditions  
837 and general anesthesia as reported previously<sup>81</sup>. The monkeys were trained to direct their gaze to a  
838 0.5° diameter fixation dot and hold their eyes within a fixation window (1.1° diameter). They then  
839 underwent a second operation to implant 5x5 arrays of micro-electrodes (Utah-probes, Blackrock  
840 Microsystems) over opercular V1 and V4. The inter-electrode spacing of the arrays was 400µm. We  
841 obtained good signals from 4 V1 arrays in each monkey and from 2 V4 arrays in monkey B<sup>11</sup>.

842

843 *Electrophysiology*

844 We recorded neuronal activity of 192 recording sites in V1 (96 in Monkey M and 96 in Monkey B)  
845 and 48 V4 recording sites in monkey B. We recorded the envelope of multi-unit activity by digitizing  
846 the signal referenced to a subdural electrode at 24.4kHz. The signal was band-pass filtered (2nd  
847 order Butterworth filter, 500Hz-5KHz) to isolate high-frequency (spiking) activity. This signal was  
848 rectified (negative becomes positive) and low-pass filtered (corner frequency = 200Hz) to produce  
849 the envelope of the high-frequency activity, which we refer to as MUA<sup>82</sup>. The MUA signal reflects  
850 the population spiking of neurons within 100-150 $\mu$ m of the electrode and the population responses  
851 are very similar to those obtained by pooling across single units<sup>82-85</sup>.

852

853 *Receptive Field Mapping*

854 We mapped the RF of each recording site in V1 using a drifting luminance-defined bar that moved  
855 in one of four directions. The response to each direction was fitted with a Gaussian function. The  
856 borders of the RF were then calculated as described previously<sup>82</sup>. The signal-to-noise ratio ( $SNR_{RF}$ )  
857 of the response was taken as the peak of the Gaussian divided by the standard deviation of the pre-  
858 trial baseline response. We only included recording sites in the analyses with a reliable visual  
859 response (i.e., the responses to all four bar directions had an  $SNR_{RF}$  of at least 1). The median V1 RF  
860 size, taken as the square-root of the area, was 1.8° (range 0.4° to 8.2°) and the median eccentricity  
861 of the RFs was 2.4° (range 0.6° to 12.9°). We mapped V4 RFs by presenting white dots (0.5°,  
862 luminance 82  $cd\cdot m^{-2}$ ) on a gray background (luminance 14  $cd\cdot m^{-2}$ ) at different positions of a grid  
863 (0.5° spacing). The hotspot of the V4 RF was defined as the position with the maximum response  
864 (median eccentricity 4.04°, range 0.79°–7.43°) and the RF borders as the locations where activity

865 fell below 50% of the maximum<sup>86</sup>. Using this criterion, the median V4 RF size was 4.5° (range 2.6°–  
866 6.0°).

867

### 868 *Stimulus presentation*

869 In the experiments with monkeys, stimuli were presented on a CRT monitor at a refresh rate of 60Hz  
870 and resolution of 1024x768 pixels viewed from a distance of 46cm. The monitor had a width of  
871 40cm, yielding a field-of-view of 41.6 x 31.2°. All stimuli were generated in Matlab using the COGENT  
872 graphics toolbox (developed by John Romaya at the LON at the Wellcome Department of Imaging  
873 Neuroscience). The eye position was recorded using a digital camera (Thomas recordings, 250Hz  
874 frame-rate).

875

### 876 *Selection of recording sites and inclusion of data*

877 To normalize MUA, we first subtracted the mean activity in the pre-trial period in which the animal  
878 was fixating (200 to 0ms relative to stimulus onset) and divided by the maximum smoothed (26ms  
879 Gaussian kernel) peak response (0-150ms after stimulus onset). In the experiment with multiple  
880 saccades, each trial contained multiple fixations and neuronal activity was normalized to the peak  
881 response elicited by stimulus onset during the first fixation. The data are therefore in normalized  
882 units, where e.g. a value of 0.1 indicates 10% of the maximal MUA onset response. We only included  
883 recording sites on days with a sufficient signal-to-noise ratio ( $SNR_{DAY}$ ).  $SNR_{DAY}$  was estimated by  
884 dividing the maximum of the initial peak response by the standard deviation of the baseline activity  
885 across trials. When the  $SNR_{DAY}$  of a recording site was smaller than 2 on particular day, we removed  
886 that session from the analysis of that recording site. To test for statistical differences between

887 conditions and to compute the CRFs, MUA activity was generally averaged in a 0-300ms time  
888 window. Analyses with different time-windows have been specified in the main text.

889

### 890 *Analyses of latency*

891 To compute the latency of neural responses a function was fitted to the time-course of interest (i.e.  
892 the difference between object borders and non-border image regions or the difference between  
893 the object interior and background)<sup>11,12,23</sup>. The function was derived from the assumptions that the  
894 onset of the response has a Gaussian distribution and that a fraction of the response dissipates  
895 exponentially which yields the following equation:

$$896 \quad f(t) = d \cdot \exp(\mu\alpha + 0.5\sigma^2\alpha^2 - \alpha t) \cdot (G(t, \mu + \sigma^2\alpha, \sigma) + c \cdot G(t, \mu, \sigma)) \quad (5)$$

897 Where  $G(t, \mu, \sigma)$  is a cumulative Gaussian density with mean  $\mu$  and standard deviation  $\sigma$ ,  $\alpha^{-1}$  is the  
898 time constant of the dissipation, and  $c$  and  $d$  represent the contribution the non-dissipating and  
899 dissipating components, respectively. The latency was defined as the point at which the fitted  
900 function reached 33% of its maximum. To compare the latency of the BoM and OBM between  
901 fixation 1 and fixations 2-6, we first subtracted from the OBM latency for each recording site from  
902 the latency of visually driven response and performed a Wilcoxon signed rank test (Fig. S7). The  
903 latency of visually driven response was computed as the difference between the response elicited  
904 by images with the highest and lowest contrast levels in the RF.

905

### 906 *Natural images presented in the electrophysiological experiments*

907 Four BSD images from the fMRI experiment were used in the electrophysiological experiments in  
908 which the monkeys made saccades (11.6° radius visual angle; Figure S1). At the start of the trial the  
909 screen was gray (26.8 cd·m<sup>-2</sup>) with a red fixation point with a position that was randomly selected

910 from uniformly spaced grid (with ~500 positions) covering the circular aperture of the image. The  
911 image appeared once the monkey had maintained fixation for 300ms (fixation 1). After an additional  
912 400ms, the first fixation point disappeared and another fixation point appeared, at a position  
913 sampled from the same grid. The monkey made a saccade to the new fixation point and maintained  
914 fixation for an additional 400ms. This fixation-saccade procedure was repeated five times (fixations  
915 2-6). Reward was delivered after every correct fixation, with an extra amount at the end of the trial,  
916 i.e. after the 6<sup>th</sup> correct fixation. Aborted trials (i.e., when the monkeys did not maintain fixation for  
917 400ms or did not perform a saccade within 700ms) were repeated at the end. The same image was  
918 presented in multiple recording days until data for five repetitions of each grid point for every  
919 fixation number was collected. We included data from all correct fixations (e.g., if the trial was  
920 interrupted after five fixations, we included the first four). Between the trials, the monkeys  
921 occasionally also fixated on parts of the image for longer than 300ms, and we also included these  
922 spontaneous fixations in the analysis. We collected a total of 11,783 correct trials for monkey M and  
923 13,373 for monkey B, for a total of 50,849 fixations analyzed for monkey M and 60,211 for monkey  
924 B.

925

#### 926 *Data analysis*

927 We determined the coordinates of the RF on the image for every fixation and analyzed the data  
928 from the first fixation and later fixations separately. We computed contrast, BoM and OBM in the  
929 RF, as described above. To quantify the independent influence of object borders, object interiors  
930 and contrast, we carried out a variance partitioning analysis<sup>87</sup>. For each recording site, we  
931 determined how much variance ( $R^2$ ) was explained by RMS contrast, object borders and object  
932 interiors with independent linear regressions, and by combinations of the three predictors in

933 multiple linear regressions. For example, the independent fraction of explained variance (FEV) for  
934 the contrast predictor was computed for every recording site as follows:

$$935 \quad R_{contrast}^2 = \frac{(R_{full}^2 - R_{BoM + OBM}^2)}{R_{full}^2} \quad (6)$$

936 where  $R_{full}^2$  is the variance explained by the full model, including all the predictors, while  
937  $R_{BoM + OBM}^2$  is the variance explained by the model including BoM and OBM as predictors while  
938 leaving contrast out. Similar equations were derived for the FEV accounted for by BoM and OBM.  
939 The explained variance estimates were then averaged across recording sites. The full model  
940 explained 6.4% of the variance in V1 for fixation 1 (mean across recording sites), 4.3% for fixations  
941 2-6, 3.2% in V4 during fixation 1 and 2.5% for fixations 2-6. The FEV values for each area and  
942 condition presented in the main text were normalized to these values (see equation 6).

943

#### 944 *RF models and the prediction of perceived borders*

945 We determined the selectivity of the neurons at a recording site (time-window 25-75ms), according  
946 to previous studies<sup>25-28</sup> which established a mapping between an artificial neural network (ANN)  
947 and neuronal tuning (Fig. S9).

948 We extracted the activity of units of VGG-19's layer conv3\_1 (state of the art in predicting V1  
949 responses to natural images<sup>28,29</sup>) and followed the approach of ref.<sup>28</sup> with two modifications. We  
950 used a two-step mapping<sup>26,27</sup>, described by following the equation:

$$951 \quad r = f_{VGG-19}(input) * W_s * W_d \quad (7)$$

952 where  $r$  is the predicted response of V1 recording site,  $f_{VGG-19}(input)$  is the output of VGG-19's  
953 conv3\_1 to our stimulus set (i.e.  $input$ ), and  $W_s$  and  $W_d$  are two sets of weights defining spatial and

954 feature selectivity, respectively. The spatial mask ( $W_s$ , initialized as the 2D Gaussian RF estimate)  
955 approximates the RF and a weighted sum of the nodes in the ANN ( $W_d$ ) approximates the feature  
956 selectivity of the recorded neurons<sup>26</sup>. We trained the model to optimize  $W_s$  and  $W_d$  to predict V1  
957 responses to the training set (i.e., *input* in eq. 7). The activity of V1 recording sites depends on a  
958 small and localized portion of the *input* and we therefore cropped the RF models around the most  
959 active pixels (3 SD or more away from the global mean) following the procedure in ref.<sup>25</sup>. To visualize  
960 tuning (Fig. 5b,c), we kept  $W_s$  and  $W_d$  constant and varied *input* to maximize the response of the  
961 model for a particular V1 recording site. We used cross-validation to assess the quality of the fit as  
962 in ref.<sup>25</sup>. Specifically, we used 5,000 trials for training and 100 trials for cross-validation. We trained  
963 the model for 300 epochs with a batch size of 256, using 10% of the training set for validation.

964 To estimate how well the V1 RF models could detect perceived borders (F-stat metric; Fig. 5b), we  
965 first convolved the RF models with unseen images from the BSD test set (100 grayscale images), and  
966 matched them with the annotated versions<sup>21</sup>. For simplicity, we defined the border detection  
967 performance (BoP) as the F-measure, employed by the authors of the BSD for benchmark  
968 evaluation, which we computed using the MATLAB code associated with the dataset:  
969 (<https://www2.eecs.berkeley.edu/Research/Projects/CS/vision/bsds/code/>)<sup>20</sup>. We estimated the  
970 chance-level performance in border-detection with a (null) permutation distribution (horizontal  
971 dashed line in Fig. 5c; 97.5% level the distribution), shuffling the class labels (after 72 iterations, one  
972 for each recording site included in this analysis. A generalized Pareto distribution was fit to the tail  
973 of the permutation distribution<sup>88</sup>. The models were implemented using custom Python code using  
974 NumPy<sup>89</sup>, SciPy (SciPy.org), Tensorflow 1.5<sup>90</sup> and with modules from  
975 <https://github.com/dicarlolab/npc><sup>26</sup> and <https://github.com/sacadena/Cadena2019PlosCB><sup>28</sup>.

976



977 *Perceived borders and object interior detection of a population of V1 neurons*

978 To examine the strength of BoM and OBM signals across a larger population of V1 recording sites  
979 (Fig. 5d), we trained SVMs to discriminate between object borders and non-border image regions  
980 based on the activity of 19 recording sites with RFs smaller than 1.5°. We also trained them to  
981 distinguish between object interiors and the background. We used 2 of the 4 images for training and  
982 the other two for cross-validation.

983

984 *Neuronal activity profiles across the images*

985 To examine the overall activity level elicited by the images (Fig. 3b), we multiplied the activity by  
986 2d-Gaussian approximation of the RFs, weighted by sampling of the visual space caused by the  
987 overall pattern of fixations<sup>5,20,91-95</sup> at 7 time points (from 0 to 300ms in 50ms steps) and activity was  
988 averaged within a 25ms window centered on each time-point.

989

990 *Statistics*

991 We compared differences between the CRFs between object borders and non-border image regions  
992 and between object interiors and the background using a bootstrapping procedure (1,000  
993 iterations), as described for the fMRI data above. To test for differences in the median latencies of  
994 BoM and OBM between regions and conditions, we used a signed-rank Wilcoxon test across  
995 recording sites. The significance of the Pearson's correlation between BoM at the peak of response  
996 and the segmentation performance across V1 recordings sites (Fig. 5b) was assessed with a t-test.

997

998 **Isolated patches experiment**

999 To test whether isolated image patches from the BSD that were either centered on object borders  
L000 or not elicited a different level of V1 activity, we carried out an additional experiment in monkey B  
L001 (50 recording sites, Fig. 5e-g). We chose three V1 recording arrays and centered 100 patches of the  
L002 image from the BSD that contained object contours and 100 patches that did not contain object  
L003 contours on the RFs. These patches were automatically selected so that the RMS contrast was the  
L004 same ( $70\pm 1\%$ ) and the size matched to the median RF of the recording sites of the array ( $0.9^\circ - 2.0^\circ$ ).  
L005 The patches were presented on a grey background ( $26.8 \text{ cd}\cdot\text{m}^{-2}$ ) while the monkey maintained gaze  
L006 on a red fixation point for 300ms. We repeated each stimulus five times and collected a total of  
L007 3,000 trials (1,000 trials per array). We tested the significance of the difference in the activity elicited  
L008 by isolated object and non-object contour patches at the peak of the response (25-75ms) with a  
L009 Wilcoxon signed rank test across recording sites.

L010

### L011 **Contextual BoM experiment**

L012 To examine differences in activity elicited by object and non-object contours when the stimulus in  
L013 the RF was held constant (Figure 6) we selected twelve images from the BSD, which were cropped  
L014 and upsampled to  $512 \times 512$  pixels ( $23.2^\circ \times 23.2^\circ$ ). We ensured that the portion of the image covered  
L015 by the RF of each recording site and its surround were exactly the same across conditions (same size  
L016 and content, Fig. 6), so that border salience only depended on information outside the neurons' RF.  
L017 We used a  $2 \times 2$  design. The first factor was whether the image element in the RF fell on an object  
L018 border (Fig. 6a). The second factor was whether we presented the original image or a scrambled  
L019 version (also known as *metamer*). To this aim, we created three further stimuli from each image.  
L020 First, we copied a circular patch (80 pixels in diameter,  $3.7^\circ$ ) from an object contour location onto a  
L021 non-object contour location using Adobe Photoshop (blue circle in Fig. 6a, see Fig. S10 for other

l022 example images). The border of this circular patch was smoothed to blend it in at the new location.  
l023 We created two metamers using the algorithm of ref.<sup>96</sup>, with Matlab code provided by the authors  
l024 (<https://github.com/freeman-lab/metamers>). The two metamers were constructed so that either  
l025 the object- or non-object contour was kept intact, with a smooth transition to the surround.

l026 Trials started with a red fixation point and the stimulus appeared after 300ms of fixation. The  
l027 monkeys maintained fixation for an additional 400ms after stimulus onset (Fig. 6b). We ensured  
l028 that the RFs of V1 recording sites were centered on the image patch, which was identical in the four  
l029 conditions. The order of the conditions was randomized across trials and aborted trials (when the  
l030 monkeys broke fixation) were repeated at the end. We collected a total of 8,094 trials in monkey M  
l031 and 9,111 in monkey B.

l032 We tested the significance of the BoM in a window from 0-300ms after stimulus onset (subtracting  
l033 spontaneous activity, -100-0ms) with a Wilcoxon signed rank test across recording sites. We also  
l034 used a repeated-measures two-way ANOVA across recording sites, with object/non-object contour  
l035 and scrambled/not scrambled as factors.

l036

#### l037 **Data availability**

l038 Data will be available upon publication of the paper.

l039

#### l040 **Code availability**

l041 Custom code will be available upon publication of the paper.

l042

#### l043 **References**

l044 64. Brainard, D. H. The Psychophysics Toolbox. *Spat Vis* **10**, 433–436 (1997).

- l045 65. Pelli, D. G. The VideoToolbox software for visual psychophysics: transforming numbers into  
l046 movies. *Spat Vis* **10**, 437–442 (1997).
- l047 66. Nestares, O. & Heeger, D. J. Robust multiresolution alignment of MRI brain volumes. *Magn*  
l048 *Reson Med* **43**, 705–715 (2000).
- l049 67. Smith, S. M. *et al.* Advances in functional and structural MR image analysis and  
l050 implementation as FSL. *NeuroImage* **23 Suppl 1**, S208-19 (2004).
- l051 68. Yushkevich, P. A. *et al.* User-guided 3D active contour segmentation of anatomical  
l052 structures: significantly improved efficiency and reliability. *NeuroImage* **31**, 1116–1128  
l053 (2006).
- l054 69. Wandell, B. A., Chial, S. & Backus, B. T. Visualization and measurement of the cortical  
l055 surface. *J Cogn Neurosci* **12**, 739–752 (2000).
- l056 70. Harvey, B. M. & Dumoulin, S. O. The relationship between cortical magnification factor and  
l057 population receptive field size in human visual cortex: constancies in cortical architecture. *J*  
l058 *Neurosci* **31**, 13604–13612 (2011).
- l059 71. Wandell, B. A., Dumoulin, S. O. & Brewer, A. A. Visual field maps in human cortex. *Neuron*  
l060 **56**, 366–383 (2007).
- l061 72. DeYoe, E. A. *et al.* Mapping striate and extrastriate visual areas in human cerebral cortex.  
l062 *Proc Natl Acad Sci U S A* **93**, 2382–2386 (1996).
- l063 73. Engel, S. A., Glover, G. H. & Wandell, B. A. Retinotopic organization in human visual cortex  
l064 and the spatial precision of functional MRI. *Cereb Cortex* **7**, 181–192 (1997).
- l065 74. Sereno, M. I. *et al.* Borders of multiple visual areas in humans revealed by functional  
l066 magnetic resonance imaging. *Science* **268**, 889–893 (1995).
- l067 75. Friston, K. J. *et al.* Analysis of fMRI time-series revisited. *NeuroImage* **2**, 45–53 (1995).

- l068 76. Friston, K. J. *et al.* Event-related fMRI: characterizing differential responses. *NeuroImage* **7**,  
l069 30–40 (1998).
- l070 77. Zuiderbaan, W., Harvey, B. M. & Dumoulin, S. O. Modeling center-surround configurations  
l071 in population receptive fields using fMRI. *Journal of Vision* **12**, 10 (2012).
- l072 78. Dumoulin, S. O. & Knapen, T. How Visual Cortical Organization Is Altered by Ophthalmologic  
l073 and Neurologic Disorders. *Annual Review of Vision Science* **4**, 357–379 (2018).
- l074 79. Bex, P. J. & Makous, W. Spatial frequency, phase, and the contrast of natural images. *J Opt*  
l075 *Soc Am A Opt Image Sci Vis* **19**, 1096–1106 (2002).
- l076 80. Boynton, G. M., Demb, J. B., Glover, G. H. & Heeger, D. J. Neuronal basis of contrast  
l077 discrimination. *Vision Res* **39**, 257–269 (1999).
- l078 81. Self, M. W., Kooijmans, R. N., Super, H., Lamme, V. A. & Roelfsema, P. R. Different glutamate  
l079 receptors convey feedforward and recurrent processing in macaque V1. *Proc Natl Acad Sci*  
l080 *U S A* **109**, 11031–11036 (2012).
- l081 82. Super, H. & Roelfsema, P. R. Chronic multiunit recordings in behaving animals: advantages  
l082 and limitations. *Prog Brain Res* **147**, 263–282 (2005).
- l083 83. Cohen, M. R. & Maunsell, J. H. Attention improves performance primarily by reducing  
l084 interneuronal correlations. *Nature Neuroscience* **12**, 1594–1600 (2009).
- l085 84. Palmer, C., Cheng, S. Y. & Seidemann, E. Linking neuronal and behavioral performance in a  
l086 reaction-time visual detection task. *J Neurosci* **27**, 8122–8137 (2007).
- l087 85. Trautmann, E. M. *et al.* Accurate Estimation of Neural Population Dynamics without Spike  
l088 Sorting. *Neuron* **103**, 292–308 e4 (2019).
- l089 86. Motter, B. C. Focal attention produces spatially selective processing in visual cortical areas  
l090 V1, V2, and V4 in the presence of competing stimuli. *J Neurophysiol* **70**, 909–919 (1993).

- l091 87. Lescroart, M. D., Stansbury, D. E. & Gallant, J. L. Fourier power, subjective distance, and  
l092 object categories all provide plausible models of BOLD responses in scene-selective visual  
l093 areas. *Front Comput Neurosci* **9**, 135 (2015).
- l094 88. Knijnenburg, T. A., Wessels, L. F. A., Reinders, M. J. T. & Shmulevich, I. Fewer permutations,  
l095 more accurate P-values. *Bioinformatics* **25**, i161–i168 (2009).
- l096 89. van der Walt, S., Colbert, S. C. & Varoquaux, G. The NumPy array: A structure for efficient  
l097 numerical computation. *Computing in Science and Engineering* **13**, 22–30 (2011).
- l098 90. Abadi, M. *et al.* TensorFlow: Large-Scale Machine Learning on Heterogeneous Distributed  
l099 Systems. (2016).
- l100 91. Thirion, B. *et al.* Inverse retinotopy: inferring the visual content of images from brain  
l101 activation patterns. *NeuroImage* **33**, 1104–1116 (2006).
- l102 92. Stanley, G. B., Li, F. F. & Dan, Y. Reconstruction of natural scenes from ensemble responses  
l103 in the lateral geniculate nucleus. *J Neurosci* **19**, 8036–8042 (1999).
- l104 93. Kay, K. N., Naselaris, T., Prenger, R. J. & Gallant, J. L. Identifying natural images from human  
l105 brain activity. *Nature* **452**, 352–355 (2008).
- l106 94. Miyawaki, Y. *et al.* Visual image reconstruction from human brain activity using a  
l107 combination of multiscale local image decoders. *Neuron* **60**, 915–929 (2008).
- l108 95. Nishimoto, S. *et al.* Reconstructing visual experiences from brain activity evoked by natural  
l109 movies. *Current Biology* **21**, 1641–1646 (2011).
- l110 96. Freeman, J. & Simoncelli, E. P. Metamers of the ventral stream. *Nature Neuroscience* **14**,  
l111 1195–1201 (2011).

l112

l113
